# Supplementary material for: Prognostic and predictive value of a pathomics signature in gastric cancer
Source: Springer Nature journal article supplement (doi:10.1038/s41467-022-34703-w), 2022-11-12
Supplement: MOESM1 [file 41467_2022_34703_MOESM1_ESM.pdf]

## **Supplementary Information**

### **Prognostic and predictive value of a pathomics signature in gastric cancer**

**Authors:** Dexin Chen, Meiting Fu, Liangjie Chi, Liyan Lin, Jiaxin Cheng, Weisong Xue, Chenyan Long, Wei Jiang, Xiaoyu Dong, Jian Sui, Dajia Lin, Jianping Lu, Shuangmu Zhuo, Side Liu, Guoxin Li, Gang Chen, and Jun Yan

## **Supplementary Information**

**Supplementary Methods**

**Supplementary Figures**

**Supplementary Note**

**Supplementary Table**

**Supplementary References**

## Supplementary Methods

### 1. Pipeline for extracting pathomics features using CellProfiler

CellProfiler is a free, open-source software for the quantitative analysis of biological images (<https://cellprofiler.org/>)<sup>1, 2</sup>. The haematoxylin and eosin (H&E)-stained images were split into haematoxylin-stained and eosin-stained greyscale images using the “*UnmixColors*” module<sup>3</sup>. The H&E-stained images were also converted to greyscale images using the “*ColorToGray*” module based on the “*Combine*” method for further analysis.

First, the features that indicated the image quality of the greyscale H&E, haematoxylin and eosin images were assessed by using the “*MeasureImageQuality*” module with three types of features, including blur features, intensity features and threshold features<sup>4-7</sup>. The intensity features were also measured by using the “*MeasureImageIntensity*” module.

#### (1) Blur features

*FocusScore*: A measure of the intensity variance across the image. This score is calculated using a normalized variance, which is the best-ranking algorithm for brightfield, phase contrast, and differential interference contrast images<sup>7</sup>. A higher focus score corresponds to a lower blur.

*LocalFocusScore*: A measure of the intensity variance between image subregions. A local version of the focus score subdivides the image into nonoverlapping tiles, computes the normalized variance for each, and takes the mean of these values as the final metric.

*Correlation*: A measure of the correlation of the image for a given spatial scale, and the spatial scale was set at 20 in this study. This is a measure of the image spatial intensity distribution computed across subregions of an image for the given spatial scale<sup>6</sup>. If an image is blurred, the correlation between neighbouring pixels becomes high, producing a high correlation value.

*PowerLogLogSlope*: The slope of the image log-log power spectrum. The power spectrum contains the frequency information of the image, and the slope gives a measure of image blur. A higher slope indicates a lower frequency component and hence more blur<sup>5</sup>. This metric is recommended for blur detection in most cases.

## **(2) Intensity metrics**

*MeanIntensity*: Mean of all pixel intensity values.

*MedianIntensity*: Median of all pixel intensity values.

*StdIntensity*: Standard deviation of all pixel intensity values.

*MADIntensity*: Median absolute deviation (MAD) of all pixel intensity values. The MAD is defined as the median ( $|x_i - \text{median}(x)|$ ).

*LowerQuartileIntensity*: The intensity value of the pixel for which 25% of the pixels in the object have lower values.

*UpperQuartileIntensity*: The intensity value of the pixel for which 75% of the pixels in the object have lower values.

## **(3) Threshold metrics**

*Threshold*: The automatically calculated threshold for each image to identify the tissue foreground from the unstained background with the Otsu algorithm<sup>8</sup>.

Subsequently, the colocalization and correlation between intensities in each haematoxylin image and eosin image were calculated on a pixel-by-pixel basis across an entire image by using the “*MeasureColocalization*” module<sup>9</sup>.

*Correlation:* The correlation between a pair of haematoxylin (H)- and eosin (E)-stained images was calculated as Pearson’s correlation coefficient. The calculation formula is covariance (H, E) / [std(H) × std(E)].

*Slope:* The slope of the least-squares regression between a pair of H and E images. Calculated using the model  $\alpha \times H + \beta = E$ , where  $\alpha$  is the slope.

*Overlap coefficient:* The overlap coefficient is a modification of Pearson’s correlation coefficient in which the average intensity values of the pixels are not subtracted from the original intensity values. For a pair of H and E images, the formula used to calculate the overlap coefficient is  $\text{sum}(H_i \times E_i) / \sqrt{(\text{sum}(H_i \times H_i) \times \text{sum}(E_i \times E_i))}$ .

*Manders coefficient:* The Manders coefficient for a pair of H and E images is calculated as  $M1 = \text{sum}(H_i\_coloc) / \text{sum}(H_i)$  and  $M2 = \text{sum}(E_i\_coloc) / \text{sum}(E_i)$ , where  $H_i\_coloc = H_i$  when  $E_i > 0$  or 0 otherwise, and  $E_i\_coloc = E_i$  when  $H_i > 0$  or 0 otherwise.

*Manders coefficient (Costes’ automated threshold):* Costes’ automated threshold estimates the maximum threshold of intensity for each image based on the *Correlation* value. The Manders coefficient is applied on thresholded images as  $H_i\_coloc = H_i$  when  $E_i > E_{thr}$  and  $E_i\_coloc = E_i$  when  $H_i > H_{thr}$ , where  $E_{thr}$  and  $H_{thr}$  are thresholds calculated using Costes’ automated threshold method<sup>10</sup>.

*Rank weighted colocalization coefficient:* The rank weighted colocalization (RWC) coefficient for a pair of H and E images is measured as  $RWC1 = \sum(H_i\_coloc * W_i) / \sum(H_i)$  and  $RWC2 = \sum(E_i\_coloc * W_i) / \sum(E_i)$ ; in this formula,  $W_i$  is the weight defined as  $W_i = (H_{max} - D_i) / R_{max}$ , where  $R_{max}$  is the maximum ranks among H and E based on the maximum intensity, and  $D_i = \text{abs}(\text{rank}(H_i) - \text{rank}(E_i))$  (absolute difference in ranks between H and R) and  $H_i\_coloc = H_i$  when  $E_i > 0$  or 0 otherwise and  $E_i\_coloc = E_i$  when  $H_i > 0$  or 0 otherwise<sup>11</sup>.

In addition, the granularity features of each image were calculated using the “*MeasureGranularity*” module, which outputted spectra of size measurements of the textures in the image, with a granular spectrum range of 16<sup>12, 13</sup>.

*Granularity:* The module returns one measurement for each instance of the granularity spectrum set in the range of the granular spectrum.

Ultimately, a total of 90 features were extracted. The ultimate value of each quantitative feature was averaged from the 10 tiles for further statistical analyses.

## Supplementary Figures

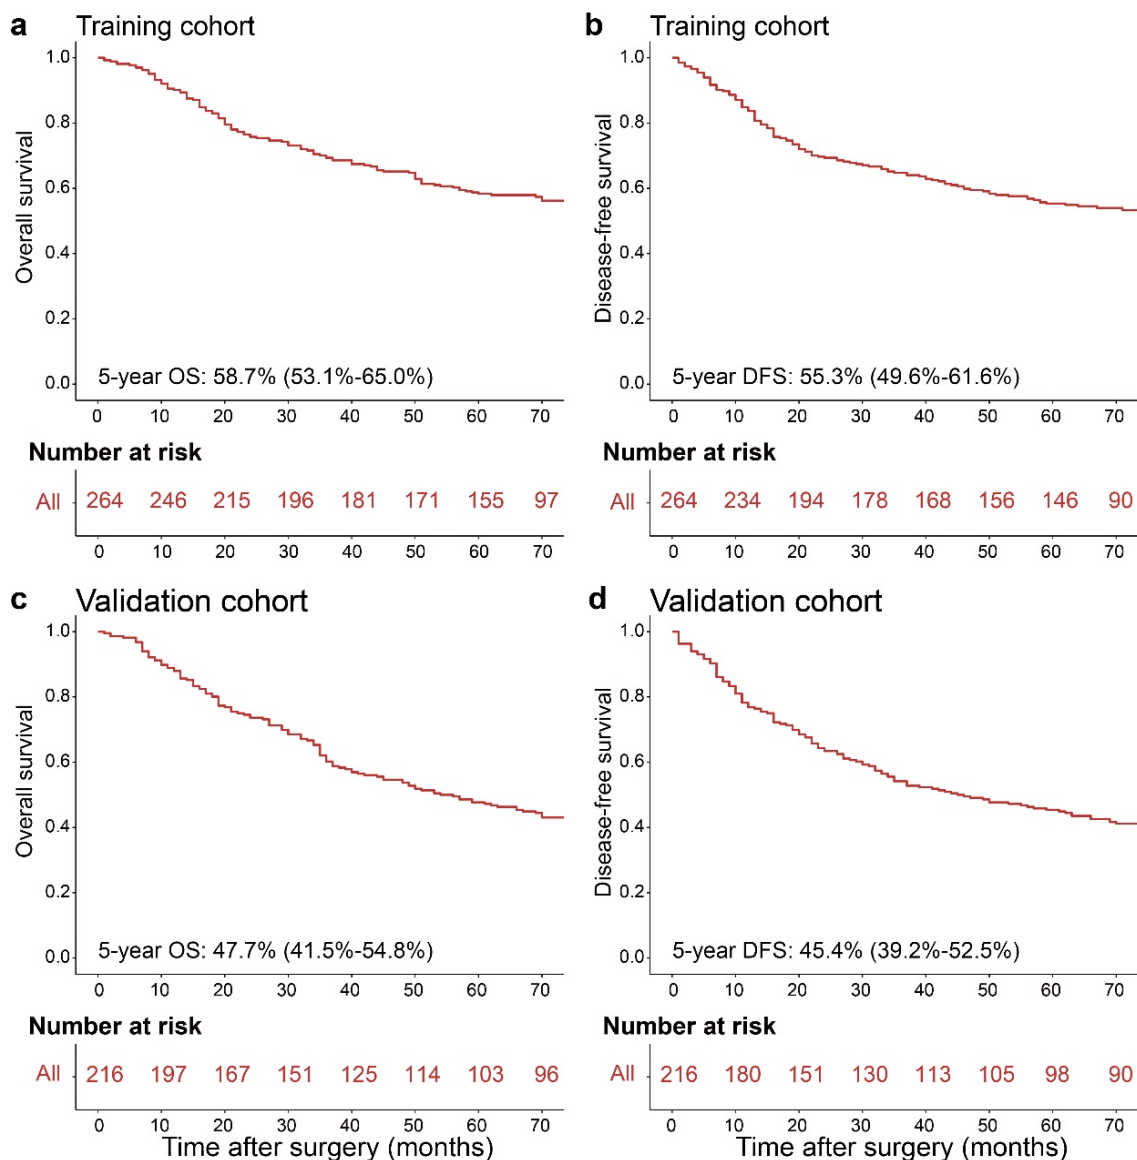

**Supplementary Fig. 1.** Kaplan-Meier survival analysis of the training and validation cohorts. **(a)** The OS curve in the training cohort. **(b)** The DFS curve in the training cohort. **(c)** The OS curve in the validation cohort. **(d)** The DFS curve in the validation cohort. OS, overall survival; DFS, disease-free survival. Source data are provided as a Source data file.

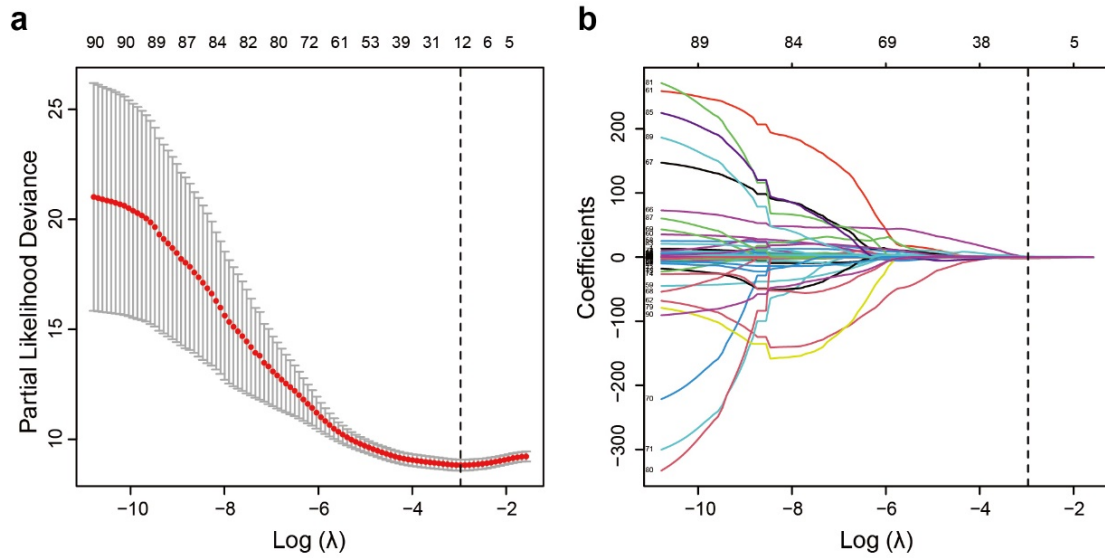

**Supplementary Fig. 2.** Feature selection using a LASSO-Cox regression model in training cohort. **(a)** Tuning parameter ( $\lambda$ ) selection for the LASSO-Cox regression model via 10-fold cross-validation. The partial likelihood deviance is plotted versus the  $\log(\lambda)$  value. Solid vertical lines represent the partial likelihood deviance  $\pm$  SE. Dotted vertical line is shown at the optimal partial likelihood deviance values, which is calculated by using the minimum criteria. A  $\lambda$  value of 0.05129246, with a  $\log(\lambda)$  value of -2.9702115162, is chosen by 10-fold cross-validation and the minimum criteria. In this cohort,  $n=264$  patients. **(b)** Profiles of coefficients from the LASSO-Cox regression model of the extracted pathomics features. A dotted vertical line is shown at the value of  $\log(\lambda) = -2.9702115162$ , at which the optimal  $\lambda$  value results in 12 nonzero coefficients. LASSO, least absolute shrinkage and selection operator; SE, standard error. Source data are provided as a Source data file.



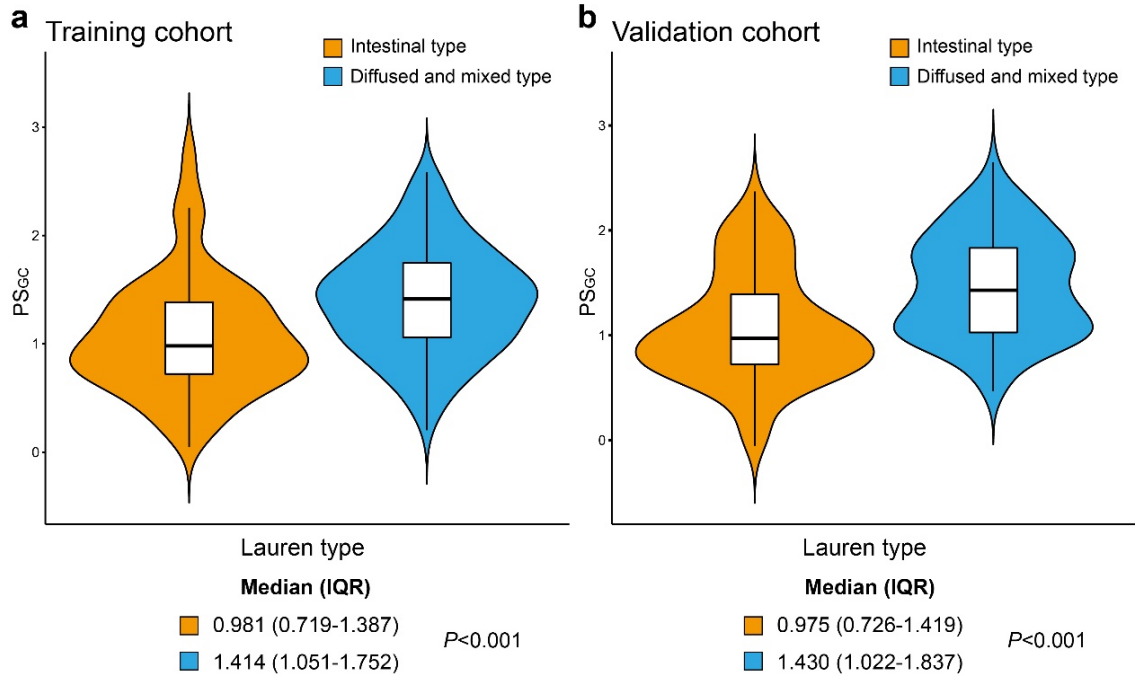

**Supplementary Fig. 3.** The distribution of PS<sub>GC</sub> based on the Lauren type in the **(a)** training and **(b)** validation cohorts. In training cohort, n=120 and 144 for patients with intestinal type and diffused and mixed type, respectively. In validation cohort, n=92 and 124 for patients with intestinal type and diffused and mixed type, respectively. In violin plots, the centre lines are median, the upper and lower bounds of boxes indicate first and third quartiles, the whiskers mean the 1.5 times of interquartile range, and the upper and lower tails represent the maxima and minima, respectively. Data are analyzed by using a two-sided Mann-Whitney *U* test. PS<sub>GC</sub>, pathomics signature of gastric cancer; IQR, interquartile range. Source data are provided as a Source data file.

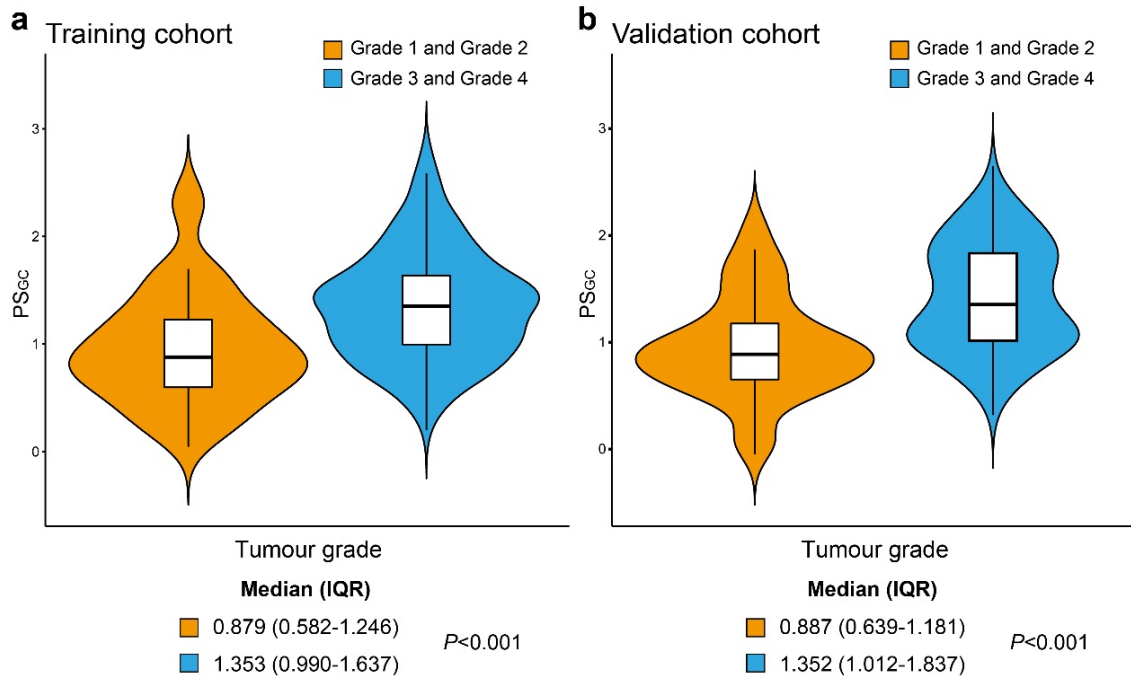

**Supplementary Fig. 4.** The distribution of PS<sub>GC</sub> based on the tumour grade in the (a) training and (b) validation cohorts. In training cohort, n=72 and 192 for patients with Grade 1-2 and Grade 3-4, respectively. In validation cohort, n=56 and 160 for patients with Grade 1-2 and Grade 3-4, respectively. In violin plots, the centre lines are median, the upper and lower bounds of boxes indicate first and third quartiles, the whiskers mean the 1.5 times of interquartile range, and the upper and lower tails represent the maxima and minima, respectively. Data are analyzed by using a two-sided Mann-Whitney *U* test. PS<sub>GC</sub>, pathomics signature of gastric cancer; IQR, interquartile range. Source data are provided as a Source data file.

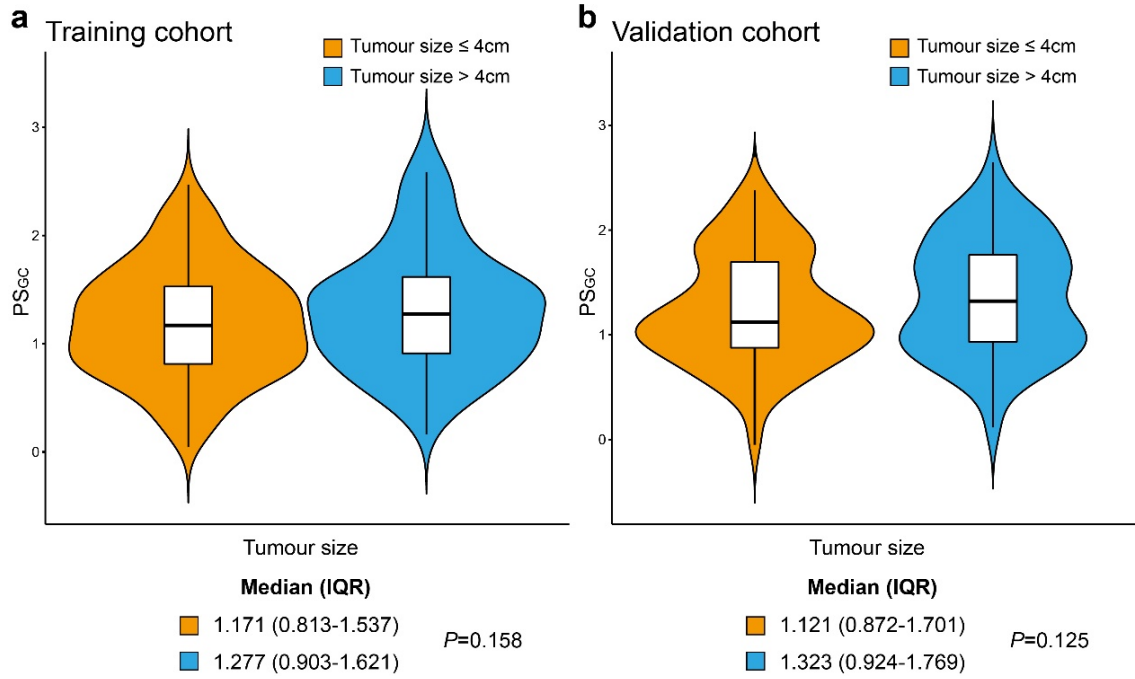

**Supplementary Fig. 5.** The distribution of PS<sub>GC</sub> based on the tumour size in the **(a)** training and **(b)** validation cohorts. In training cohort, n=147 and 117 for patients with tumour size  $\leq 4$  cm and  $>4$  cm, respectively. In validation cohort, n=110 and 106 for patients with tumour size  $\leq 4$  cm and  $>4$  cm, respectively. In violin plots, the centre lines are median, the upper and lower bounds of boxes indicate first and third quartiles, the whiskers mean the 1.5 times of interquartile range, and the upper and lower tails represent the maxima and minima, respectively. Data are analyzed by using a two-sided Mann-Whitney *U* test. PS<sub>GC</sub>, pathomics signature of gastric cancer; IQR, interquartile range. Source data are provided as a Source data file.

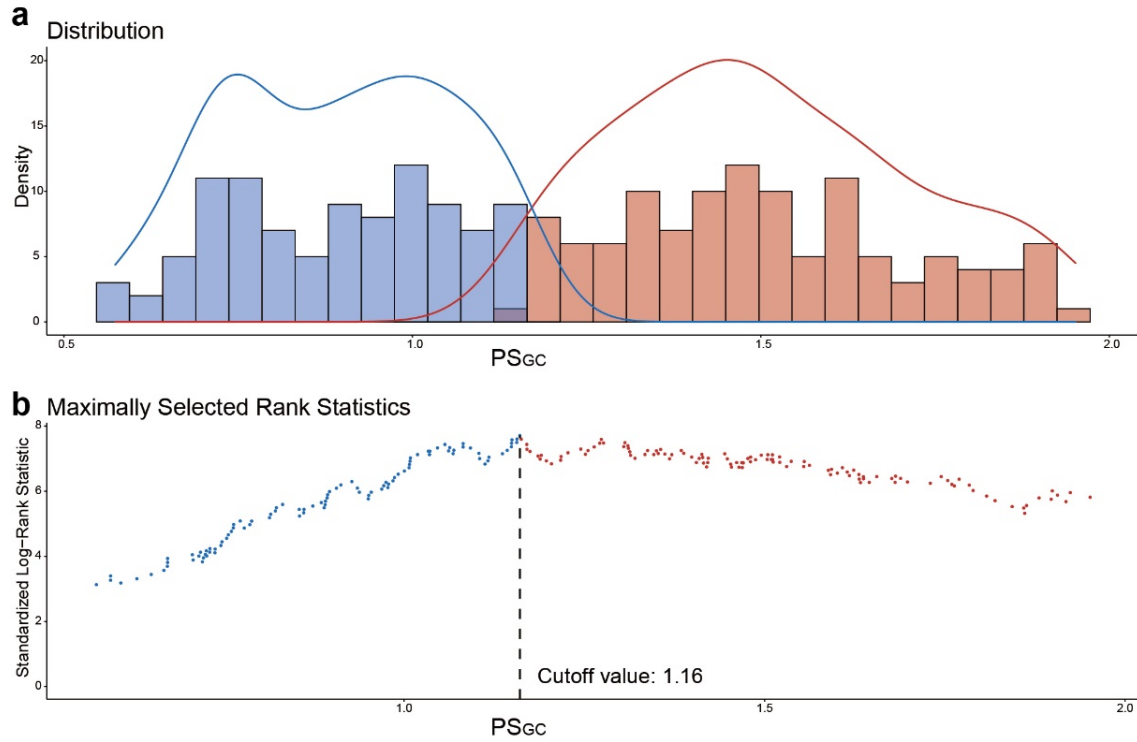

**Supplementary Fig. 6.** Selection of the optimum cutoff value for the PS<sub>GC</sub>. **(a)** Histogram showing the density distribution for high- and low-PS<sub>GC</sub> groups divided by the optimum cutoff value. **(b)** Scatter plot showing the standardized log-rank statistic value for each PS<sub>GC</sub> cutoff value. In this cohort, n=141 and 123 for patients with high PS<sub>GC</sub> and low PS<sub>GC</sub>, respectively. The cutoff value is determined by using the two-sided maximally selected rank statistics. PS<sub>GC</sub>, pathomics signature of gastric cancer. Source data are provided as a Source data file.

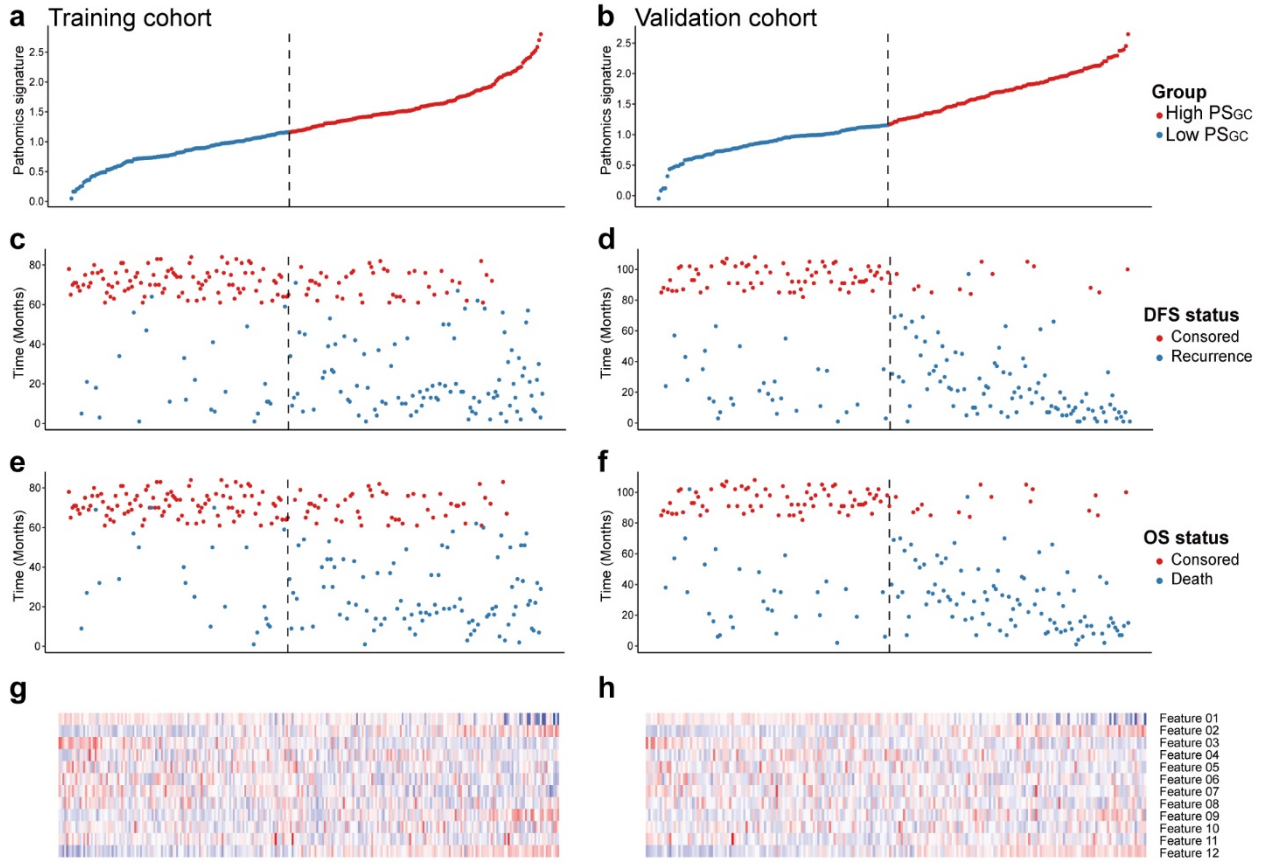

**Supplementary Fig. 7.** The distribution of the PS<sub>GC</sub> with the corresponding survival status in the training and validation cohorts. **(a)** The distribution of the PS<sub>GC</sub> in the training cohort. **(b)** The distribution of the PS<sub>GC</sub> in the validation cohort. **(c)** The DFS status in the training cohort. **(d)** The DFS status in the validation cohort. **(e)** The OS status in the training cohort. **(f)** The OS status in the validation cohort. **(g)** Colour gram of the profiles of the selected pathomics features in the training cohort. **(h)** Colour gram of the profiles of the selected pathomics features in the validation cohort. The rows of the colour gram represent 12 pathomics features, and the columns represent patients. The vertical dashed line represents the cutoff value for the PS<sub>GC</sub> that is used to divide the patients into high- and low-PS<sub>GC</sub> groups. In training cohort, n=141 and 123 for patients with high PS<sub>GC</sub> and low PS<sub>GC</sub>, respectively. In validation cohort, n=110 and 106 for patients with high PS<sub>GC</sub> and low PS<sub>GC</sub>, respectively. PS<sub>GC</sub>, pathomics signature of gastric cancer; DFS, disease-free survival; OS, overall survival. Source data are provided as a Source data file.

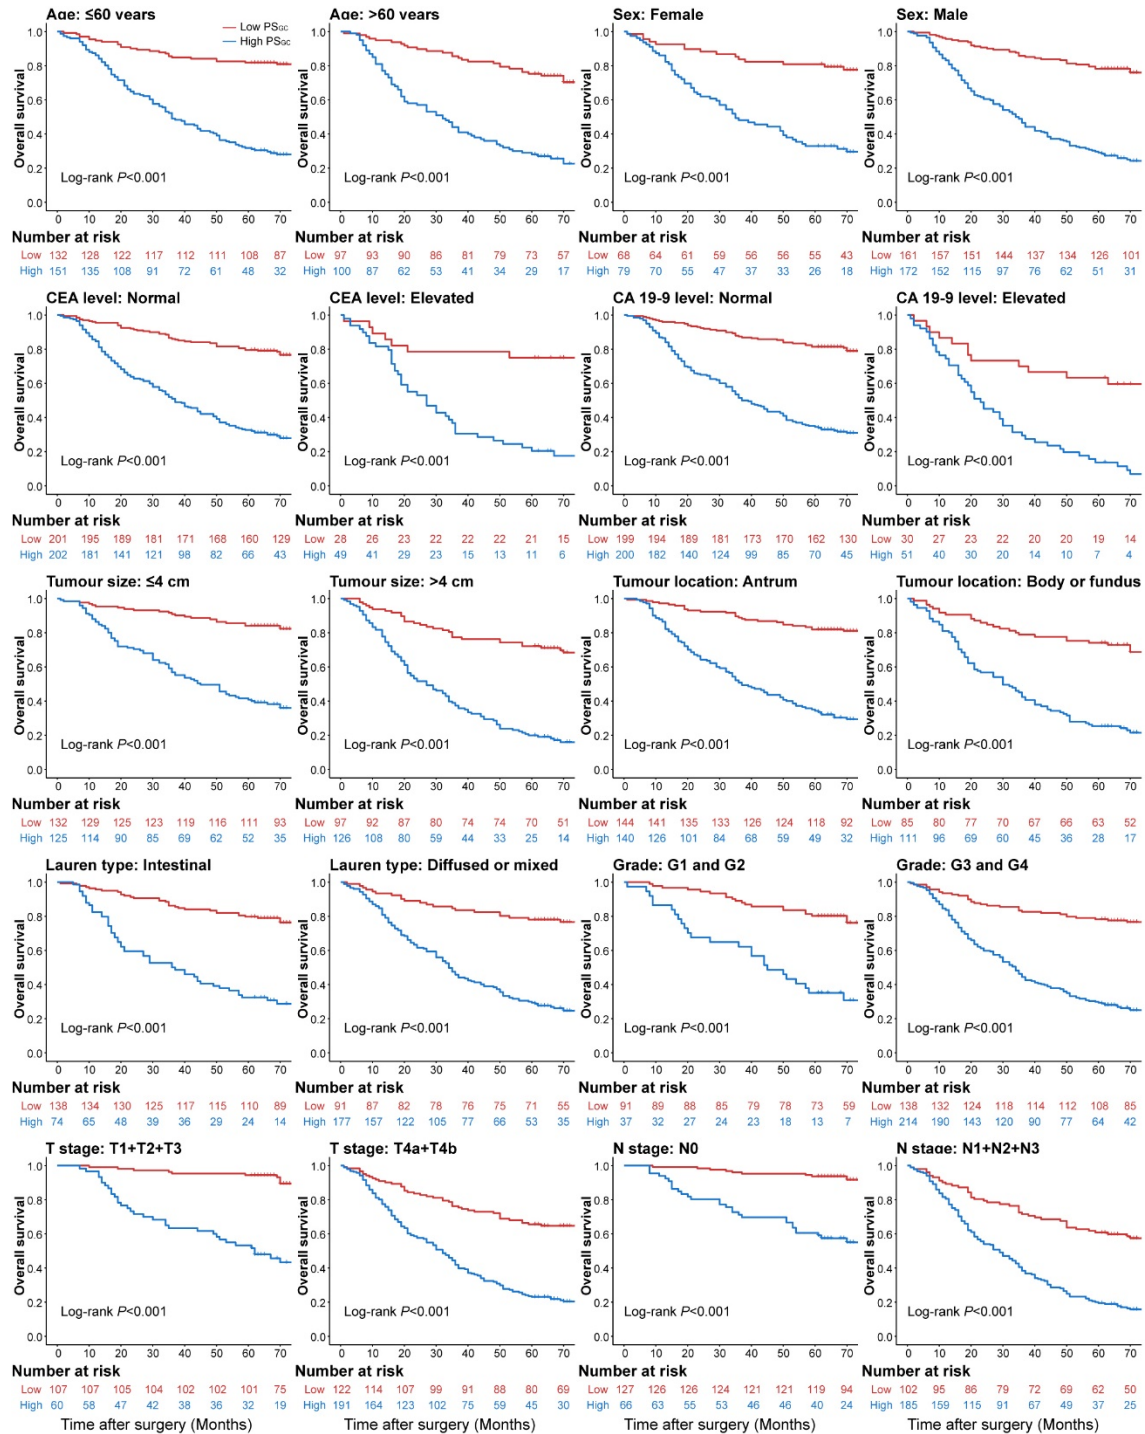

**Supplementary Fig. 8.** Kaplan-Meier survival analysis of the OS of all 480 patients according to the  $PS_{GC}$  level stratified by clinicopathological variables. The comparisons of OS between two groups are performed using a two-sided log-rank test.  $PS_{GC}$ , pathomics signature of gastric cancer; CEA, carcinoembryonic antigen; CA, cancer antigen; OS, overall survival. Source data are provided as a Source data file.



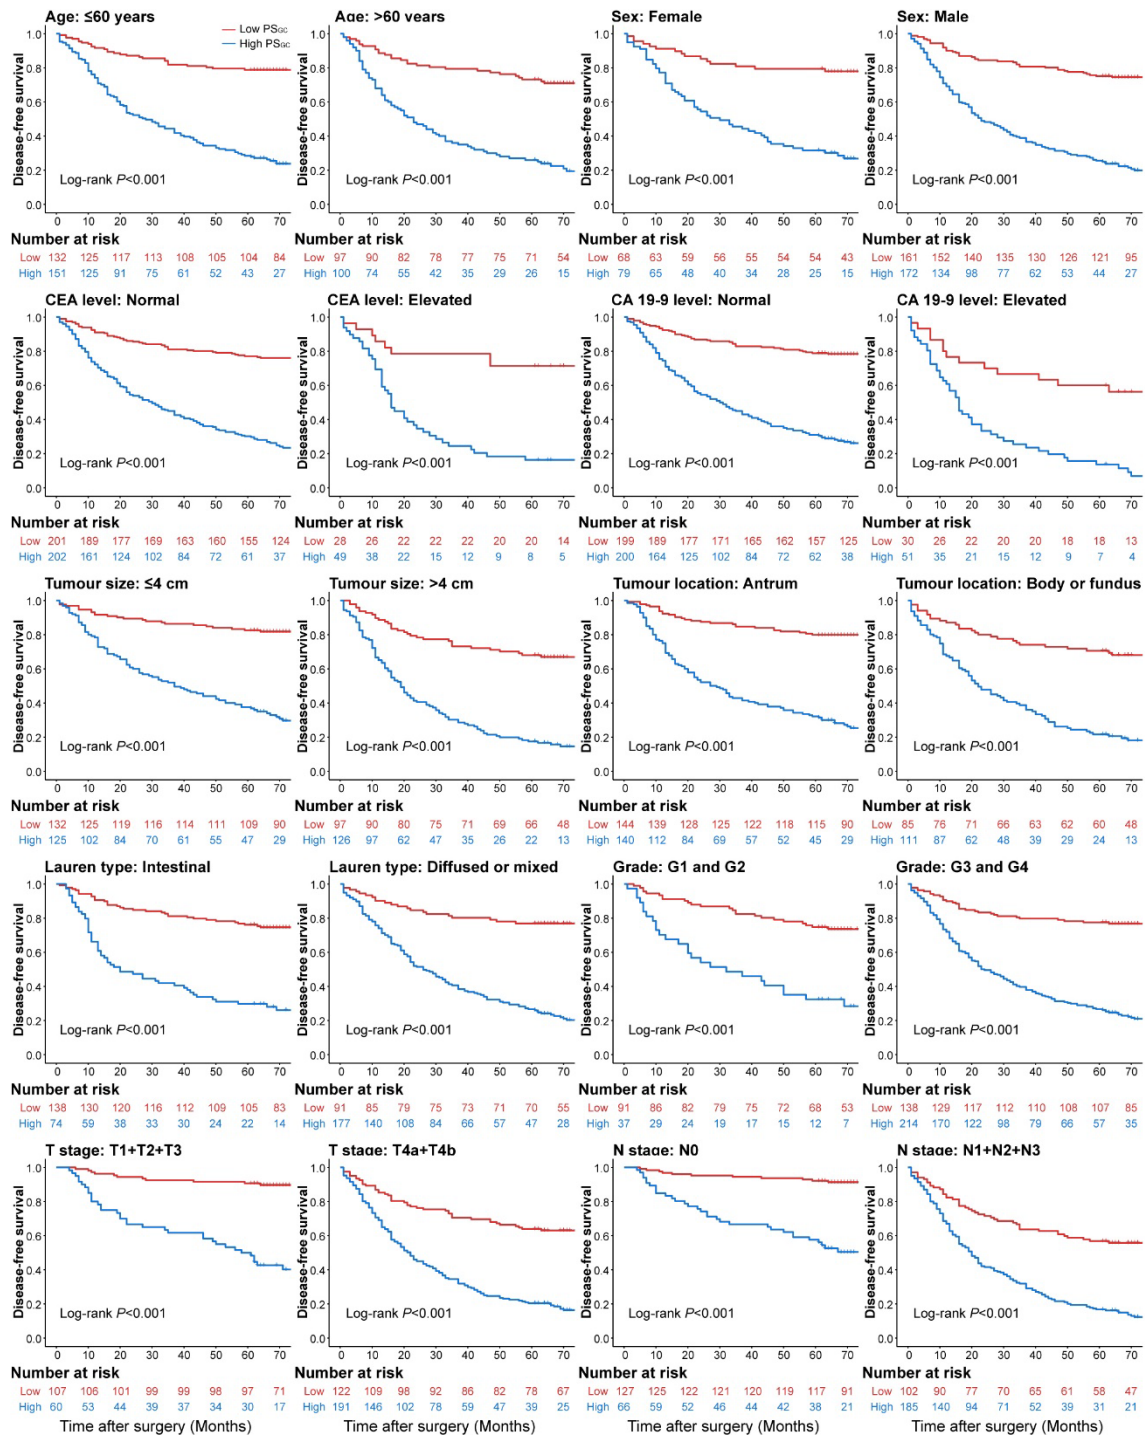

**Supplementary Fig. 9.** Kaplan-Meier survival analysis of the DFS of all 480 patients according to the  $PS_{GC}$  level stratified by clinicopathological variables. The comparisons of DFS between two groups are performed using a two-sided log-rank test.  $PS_{GC}$ , pathomics signature of gastric cancer; CEA, carcinoembryonic antigen; CA, cancer antigen; DFS, disease-free survival. Source data are provided as a Source data file.

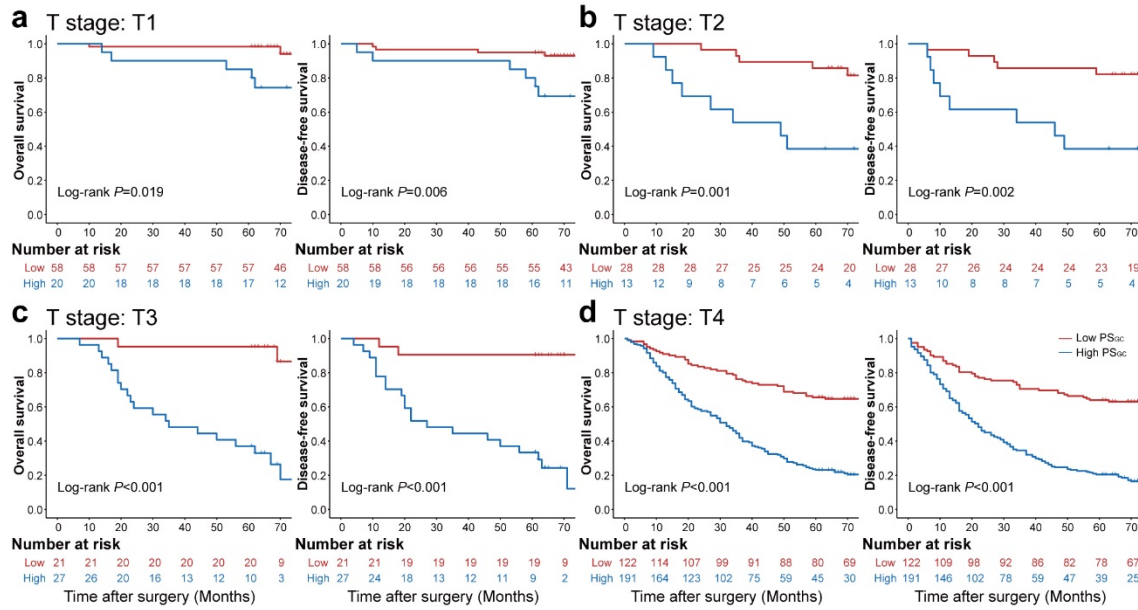

**Supplementary Fig. 10.** Kaplan-Meier survival analysis of OS and DFS according to the PS<sub>GC</sub> level of patients stratified by the depth of invasion. **(a)** Kaplan-Meier survival analysis of OS and DFS according to the PS<sub>GC</sub> level in the T1 subgroup. **(b)** Kaplan-Meier survival analysis of OS and DFS according to the PS<sub>GC</sub> level in the T2 subgroup. **(c)** Kaplan-Meier survival analysis of OS and DFS according to the PS<sub>GC</sub> level in the T3 subgroup. **(d)** Kaplan-Meier survival analysis of OS and DFS according to the PS<sub>GC</sub> level in the T4 subgroup. The comparisons of OS and DFS between two groups are performed using a two-sided log-rank test. PS<sub>GC</sub>, pathomics signature of gastric cancer; OS, overall survival; DFS, disease-free survival. Source data are provided as a Source data file.



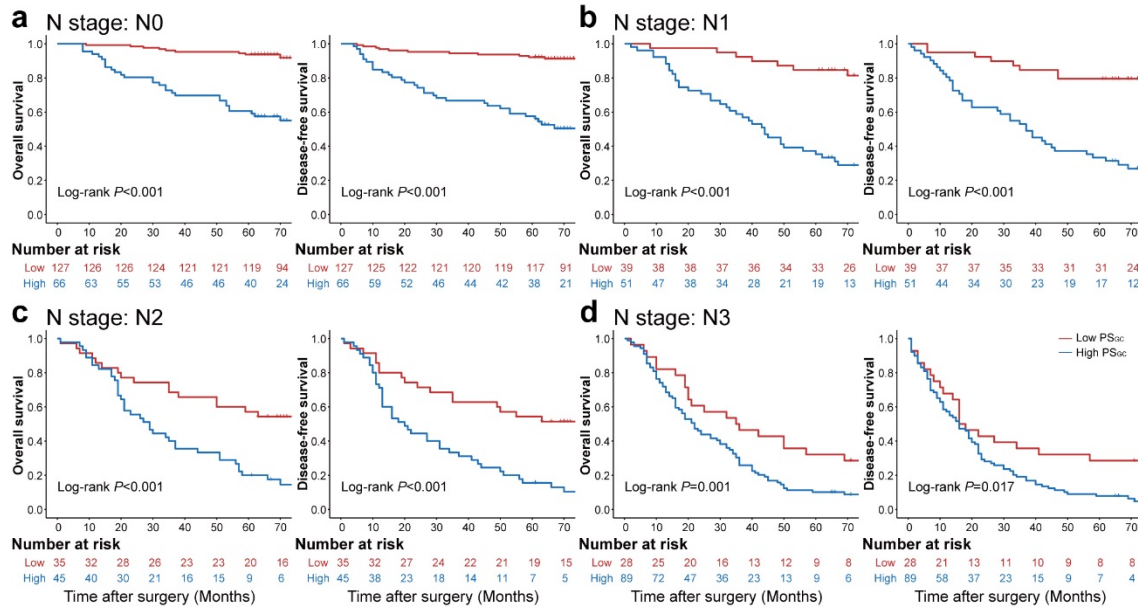

**Supplementary Fig. 11.** Kaplan-Meier survival analysis of OS and DFS according to the  $PS_{GC}$  level of patients stratified by lymph node metastasis. **(a)** Kaplan-Meier survival analysis of OS and DFS according to the  $PS_{GC}$  level in the N0 subgroup. **(b)** Kaplan-Meier survival analysis of OS and DFS according to the  $PS_{GC}$  level in the N1 subgroup. **(c)** Kaplan-Meier survival analysis of OS and DFS according to the  $PS_{GC}$  level in the N2 subgroup. **(d)** Kaplan-Meier survival analysis of OS and DFS according to the  $PS_{GC}$  level in the N3 subgroup. The comparisons of OS and DFS between two groups are performed using a two-sided log-rank test.  $PS_{GC}$ , pathomics signature of gastric cancer; OS, overall survival; DFS, disease-free survival. Source data are provided as a Source data file.

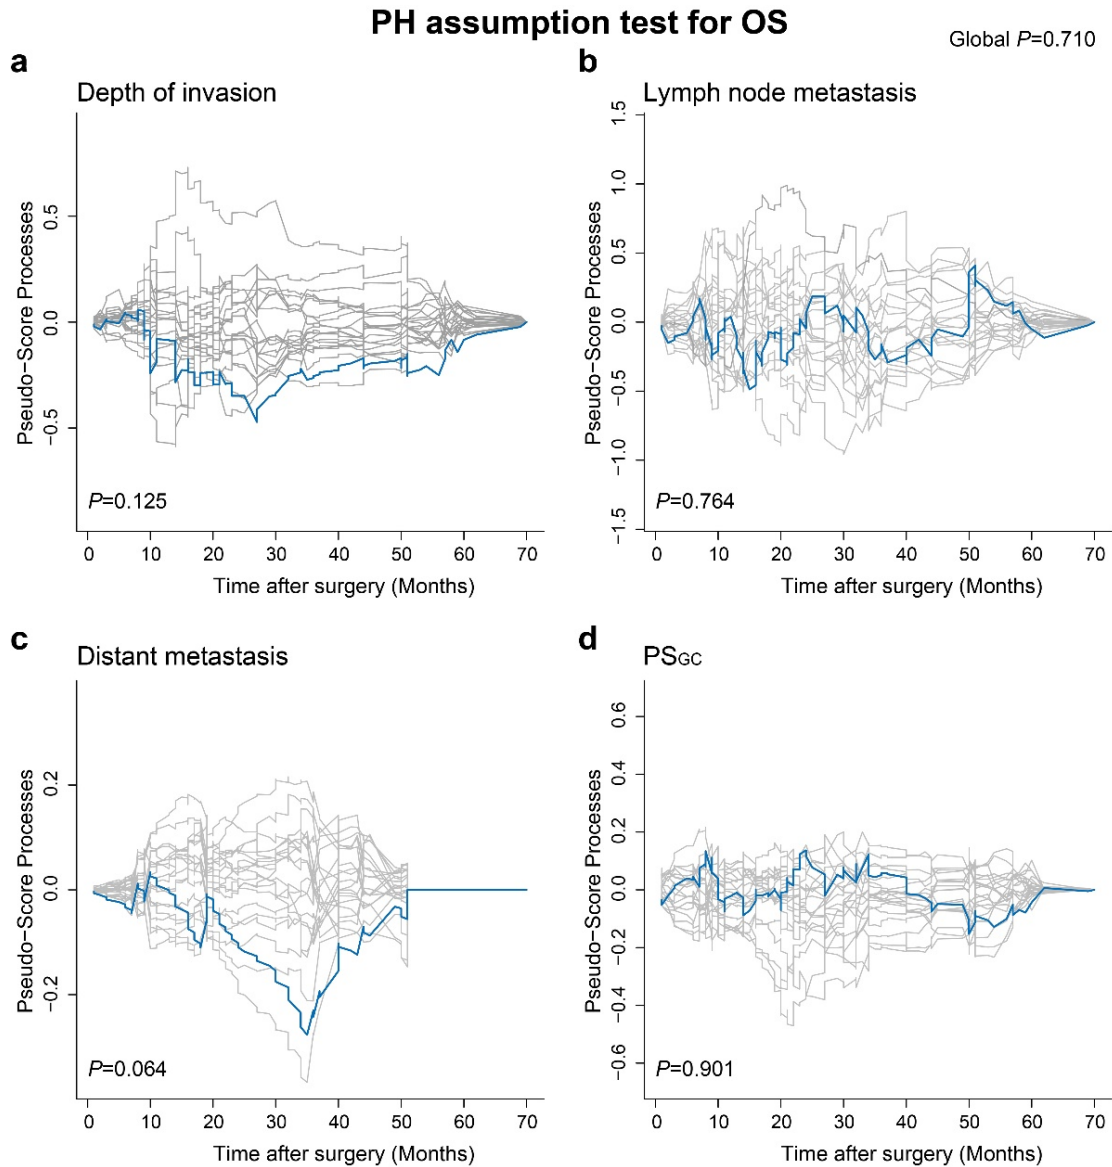

**Supplementary Fig. 12.** The PH assumption test of the multivariate Cox regression model for OS. **(a)** The PH assumption test of the depth of invasion for OS. **(b)** The PH assumption test of lymph node metastasis for OS. **(c)** The PH assumption test of distant metastasis for OS. **(d)** The PH assumption test of  $PS_{GC}$  for OS. In this cohort,  $n=264$  patients. The PH assumption is checked using a two-sided asymptotical mean-zero test. PH, proportional hazards;  $PS_{GC}$ , pathomics signature of gastric cancer; OS, overall survival. Source data are provided as a Source data file.

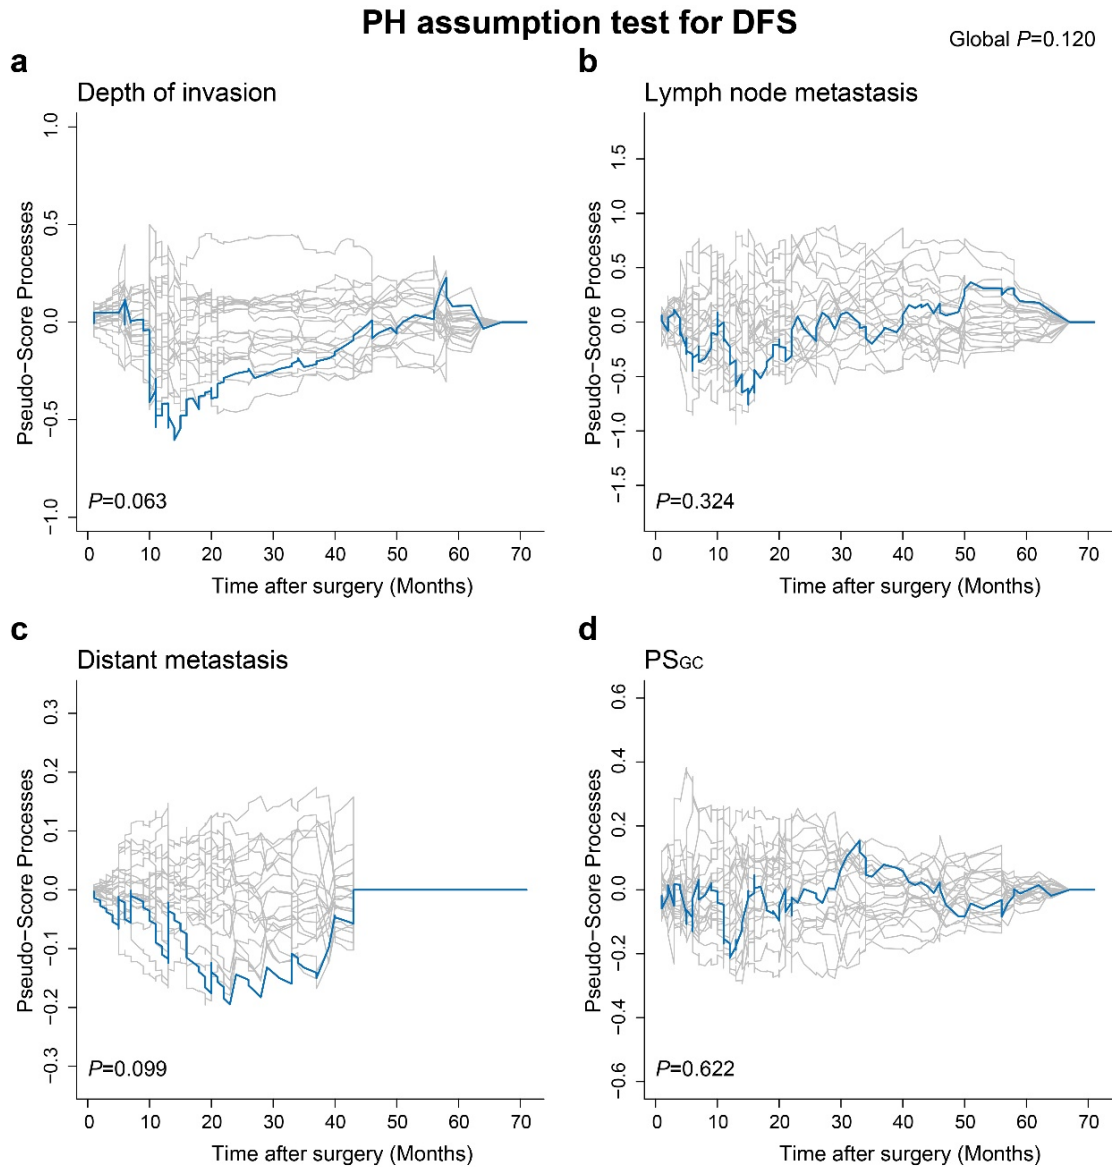

**Supplementary Fig. 13.** The PH assumption test of the multivariate Cox regression model for DFS. **(a)** The PH assumption test of the depth of invasion for DFS. **(b)** The PH assumption test of lymph node metastasis for DFS. **(c)** The PH assumption test of distant metastasis for DFS. **(d)** The PH assumption test of  $PS_{GC}$  for DFS. In this cohort,  $n=264$  patients. The PH assumption is checked using a two-sided asymptotical mean-zero test. PH, proportional hazards;  $PS_{GC}$ , pathomics signature of gastric cancer; DFS, disease-free survival. Source data are provided as a Source data file.

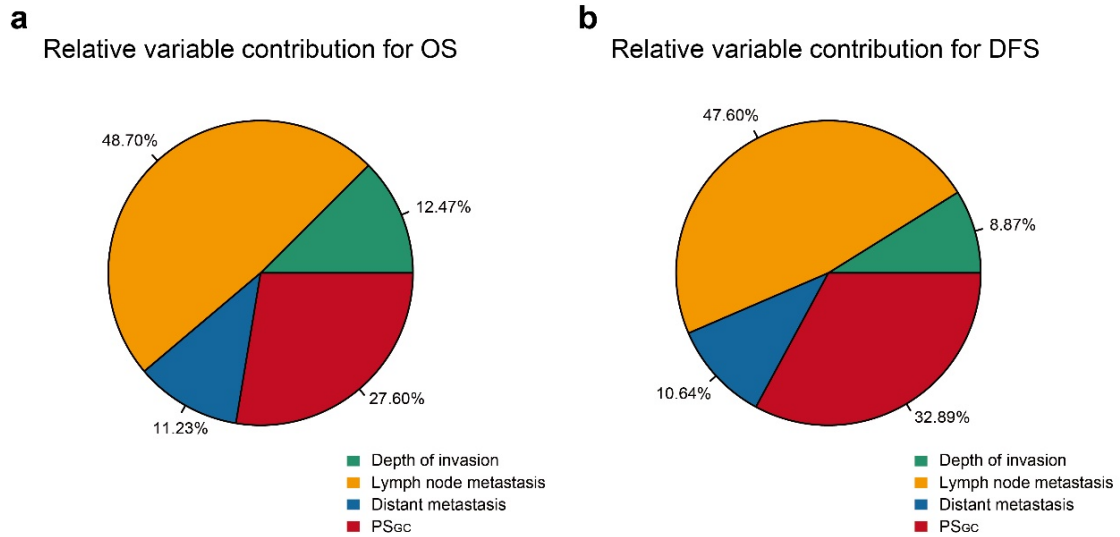

**Supplementary Fig. 14.** Relative importance of the variables in the pathomics nomogram. **(a)** Relative importance of each variable for OS in the pathomics nomogram. **(b)** Relative importance of each variable for DFS in the pathomics nomogram. PSec, pathomics signature of gastric cancer; OS, overall survival; DFS, disease-free survival. Source data are provided as a Source data file.

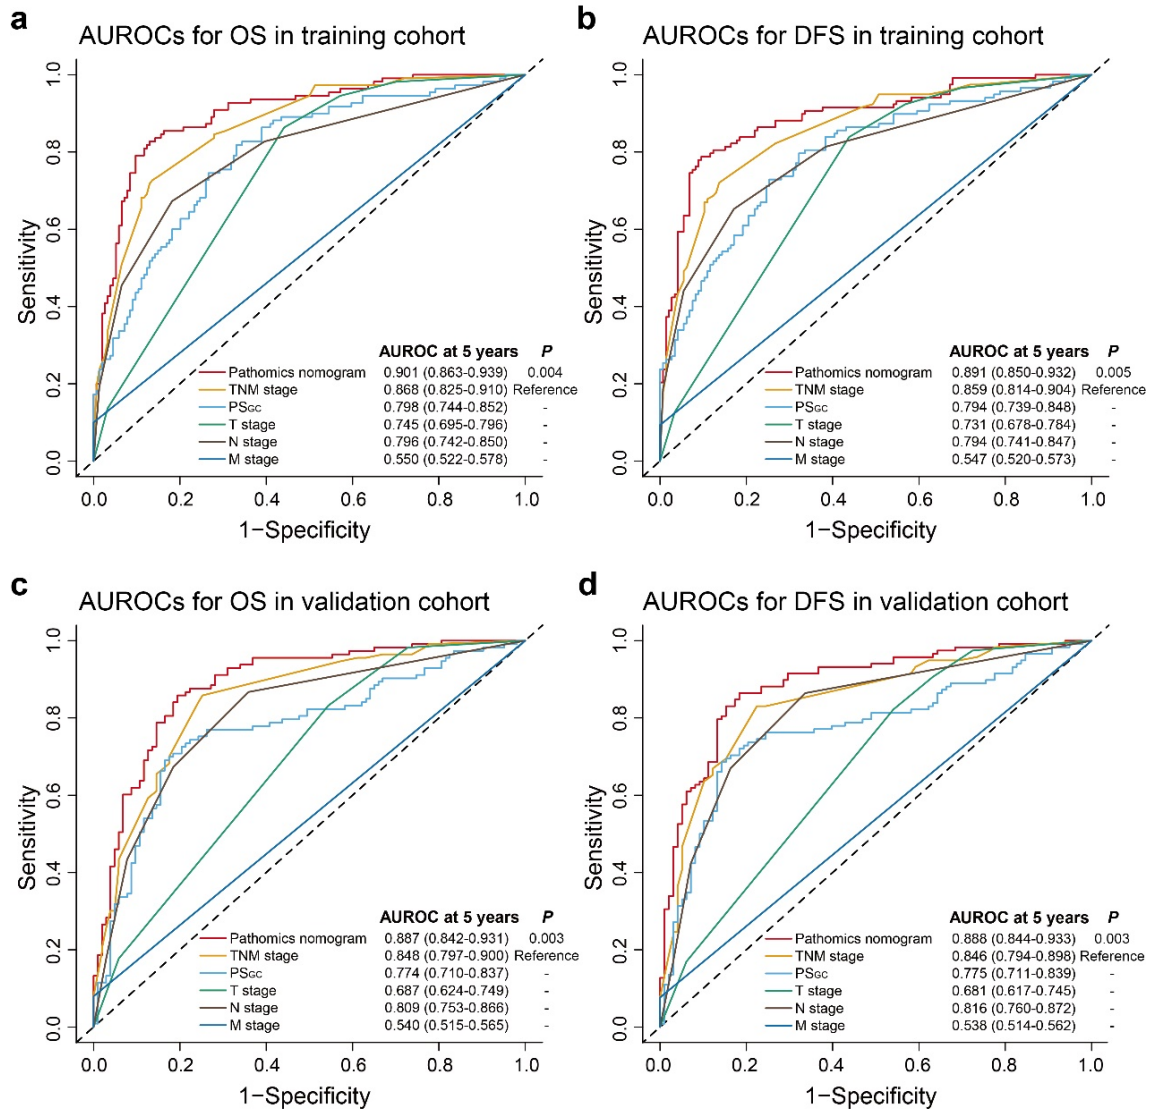

**Supplementary Fig. 15.** Time-independent ROC curves and AUROCs. **(a)** The time-independent ROC curves for OS with the AUROCs of different models in the training cohort. **(b)** The time-independent ROC curves for DFS with the AUROCs of different models in the training cohort. **(c)** The time-independent ROC curves for OS with the AUROCs of different models in the validation cohort. **(d)** The time-independent ROC curves for OS with the AUROCs of different models in the validation cohort. In training cohort, n=264 patients. In validation cohort, n=216 patients. The comparisons of AUROCs between two models are performed using a two-sided Delong test. ROC, receiver operating characteristic; AUROC, area under the receiver operating characteristic curve; OS, overall survival; DFS, disease-free survival; PS<sub>GC</sub>, pathomics signature of gastric cancer; TNM, tumour-node-metastasis. Source data are provided as a Source data file.

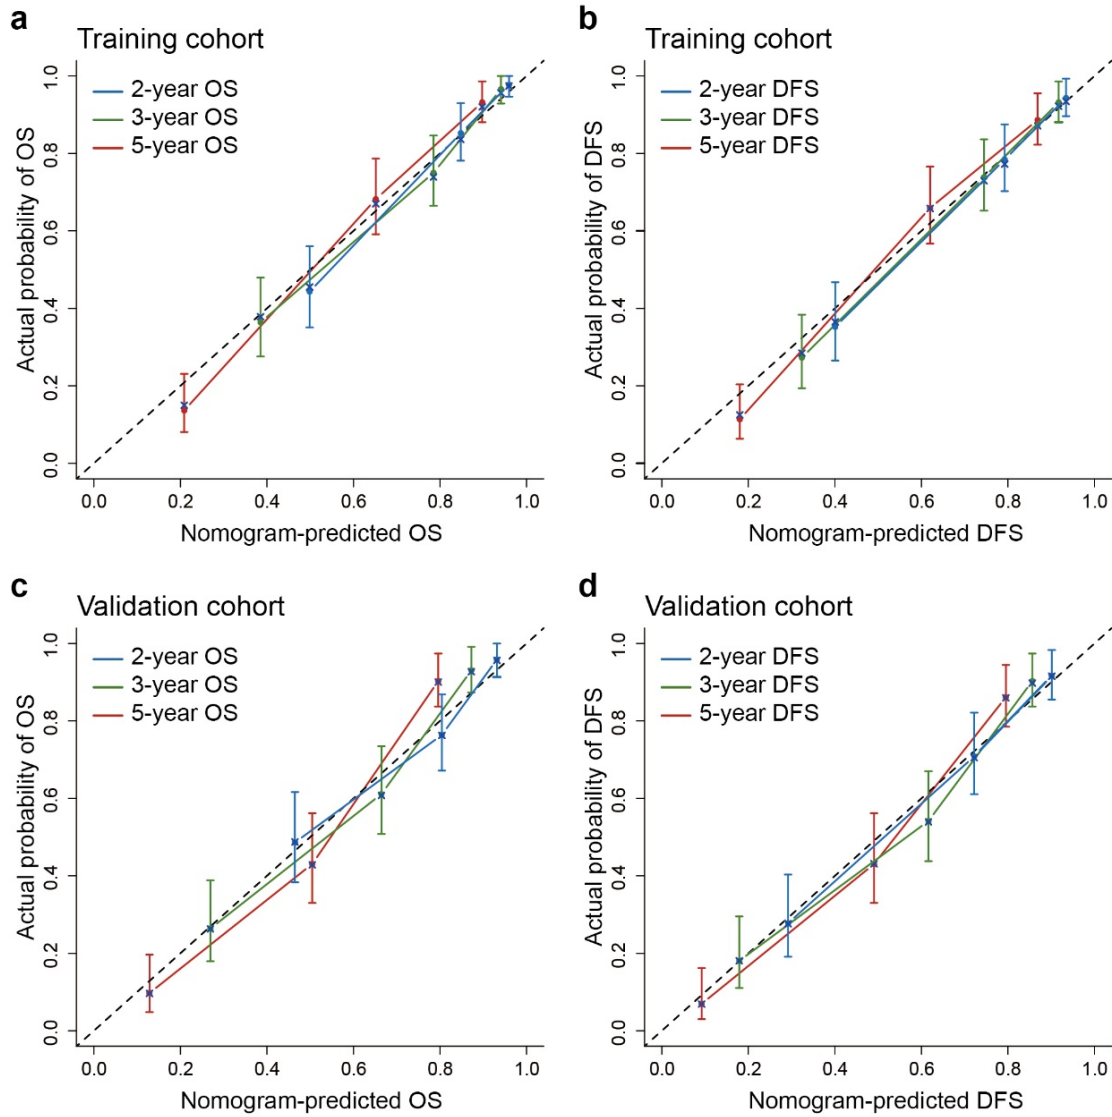

**Supplementary Fig. 16.** The calibration curves of the pathomics nomogram. **(a)** The calibration curves of the pathomics nomogram for OS in the training cohort. **(b)** The calibration curves of the pathomics nomogram for DFS in the training cohort. **(c)** The calibration curves of the pathomics nomogram for OS in the validation cohort. **(d)** The calibration curves of the pathomics nomogram for DFS in the validation cohort. Solid vertical lines and error bars represent the mean agreement between nomogram-predicted survival and actual probability of survival and the corresponding 95% confidence interval, respectively. In training cohort,  $n=264$  patients. In validation cohort,  $n=216$  patients. OS, overall survival; DFS, disease-free survival; TNM, tumour-node-metastasis;  $PS_{GC}$ , pathomics signature of gastric cancer. Source data are provided as a Source data file.



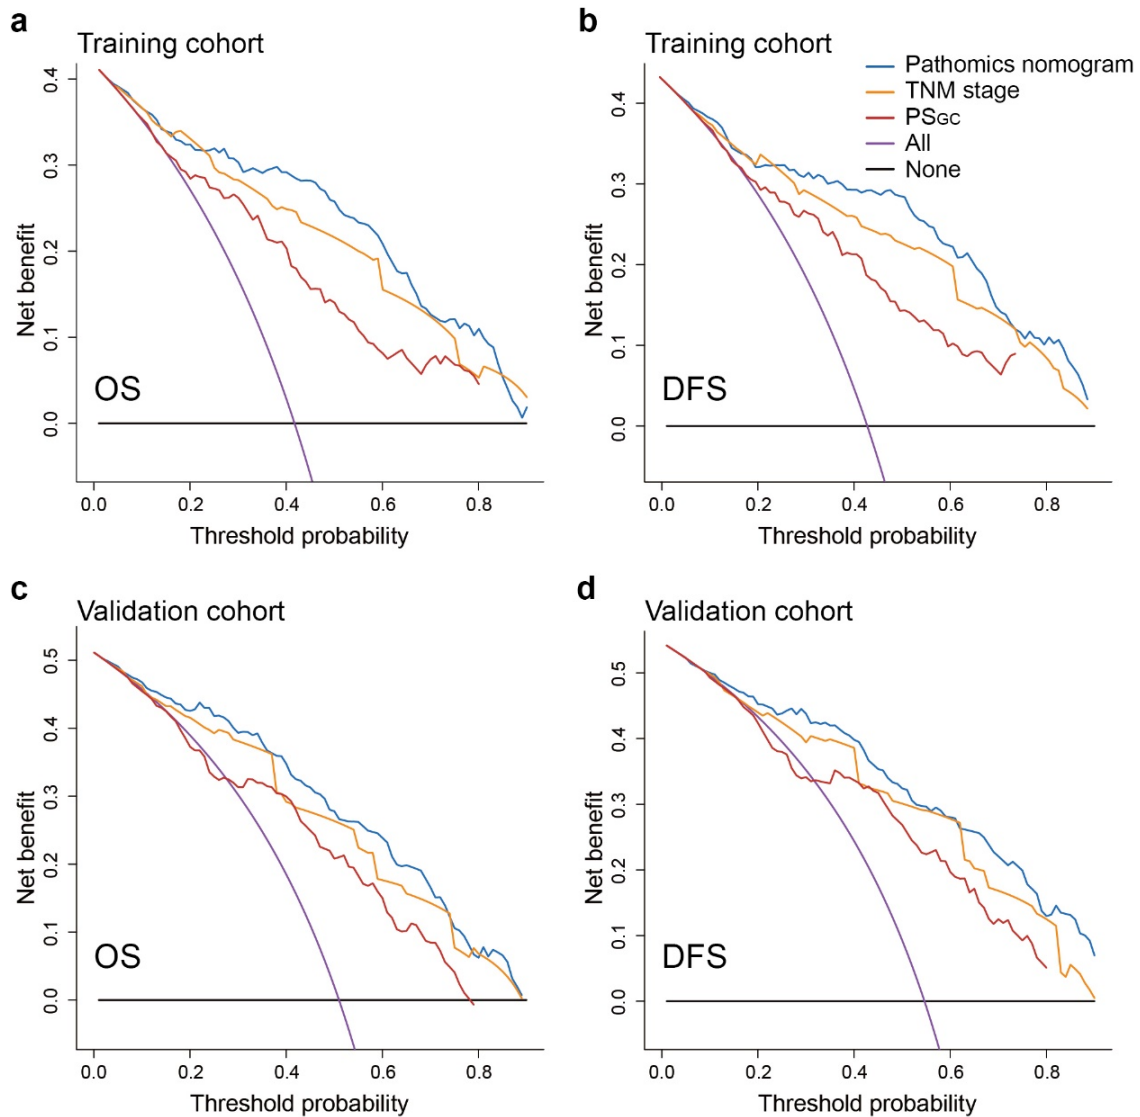

**Supplementary Fig. 17.** Decision curve analysis. **(a)** Decision curve analysis of OS for different models in the training cohort. **(b)** Decision curve analysis of DFS for different models in the training cohort. **(c)** Decision curve analysis of OS for different models in the validation cohort. **(d)** Decision curve analysis of DFS for different models in the validation cohort. In training cohort, n=264 patients. In validation cohort, n=216 patients. OS, overall survival; DFS, disease-free survival. Source data are provided as a Source data file.

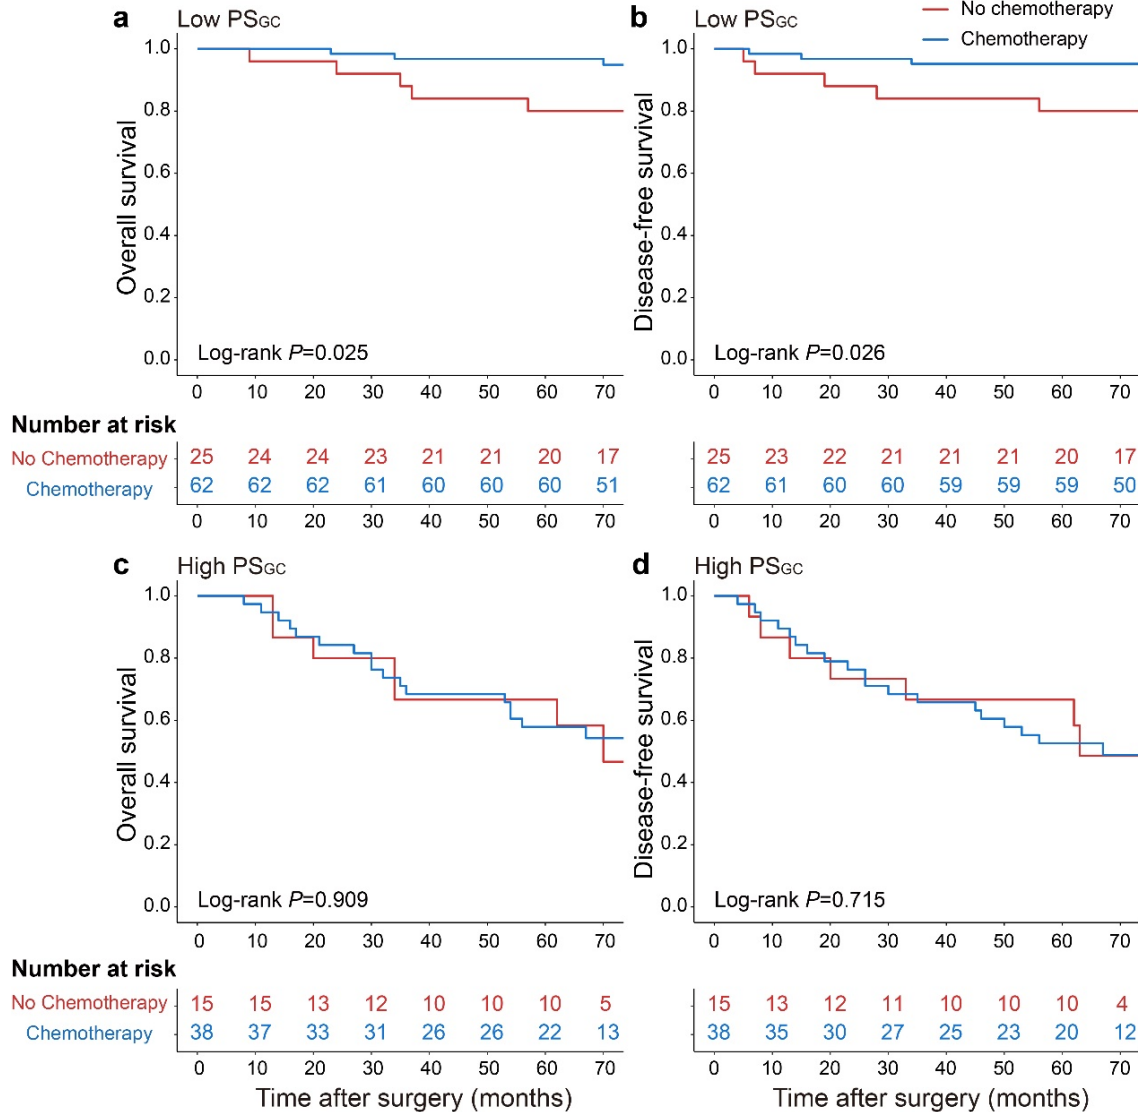

**Supplementary Fig. 18.** Adjuvant chemotherapy benefits for patients with stage II GC in terms of OS and DFS. **(a)** OS comparison according to the receipt of adjuvant chemotherapy in low-PS<sub>GC</sub> stage II GC patients. **(b)** DFS comparison according to the receipt of adjuvant chemotherapy in low-PS<sub>GC</sub> stage II GC patients. **(c)** OS comparison according to the receipt of adjuvant chemotherapy in high-PS<sub>GC</sub> stage II GC patients. **(d)** DFS comparison according to the receipt of adjuvant chemotherapy in high-PS<sub>GC</sub> stage II GC patients. The comparisons of OS and DFS between two groups are performed using a two-sided log-rank test. PS<sub>GC</sub>, pathomics signature of gastric cancer; GC, gastric cancer; OS, overall survival; DFS, disease-free survival. Source data are provided as a Source data file.



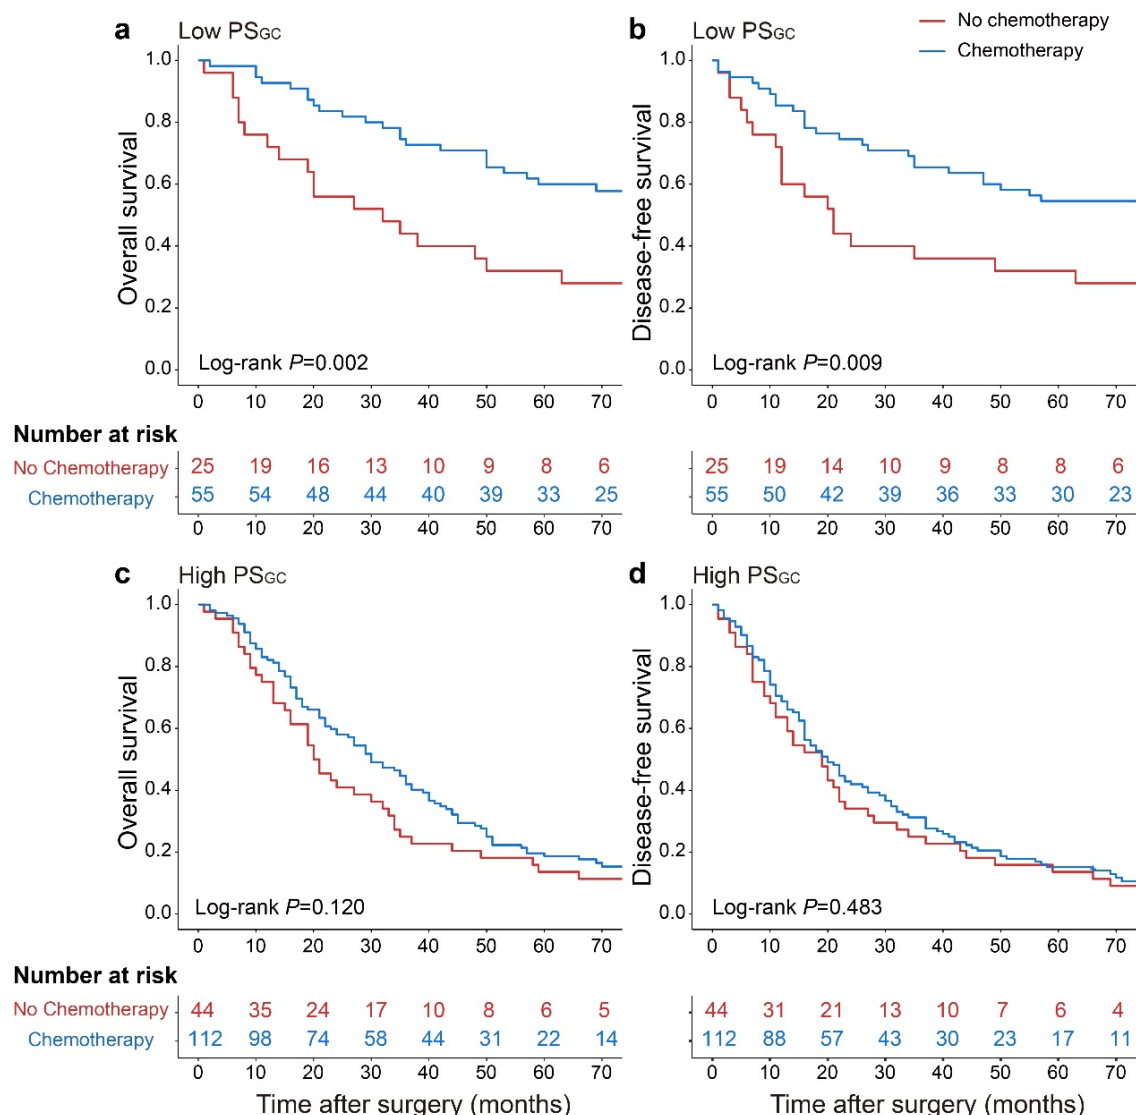

**Supplementary Fig. 19.** Adjuvant chemotherapy benefits for patients with stage III GC in terms of OS and DFS. **(a)** OS comparison according to the receipt of adjuvant chemotherapy in low-PS<sub>GC</sub> stage III GC patients. **(b)** DFS comparison according to the receipt of adjuvant chemotherapy in low-PS<sub>GC</sub> stage III GC patients. **(c)** OS comparison according to the receipt of adjuvant chemotherapy in high-PS<sub>GC</sub> stage III GC patients. **(d)** DFS comparison according to the receipt of adjuvant chemotherapy in high-PS<sub>GC</sub> stage III GC patients. The comparisons of OS and DFS between two groups are performed using a two-sided log-rank test. PS<sub>GC</sub>, pathomics signature of gastric cancer; GC, gastric cancer; OS, overall survival; DFS, disease-free survival. Source data are provided as a Source data file.

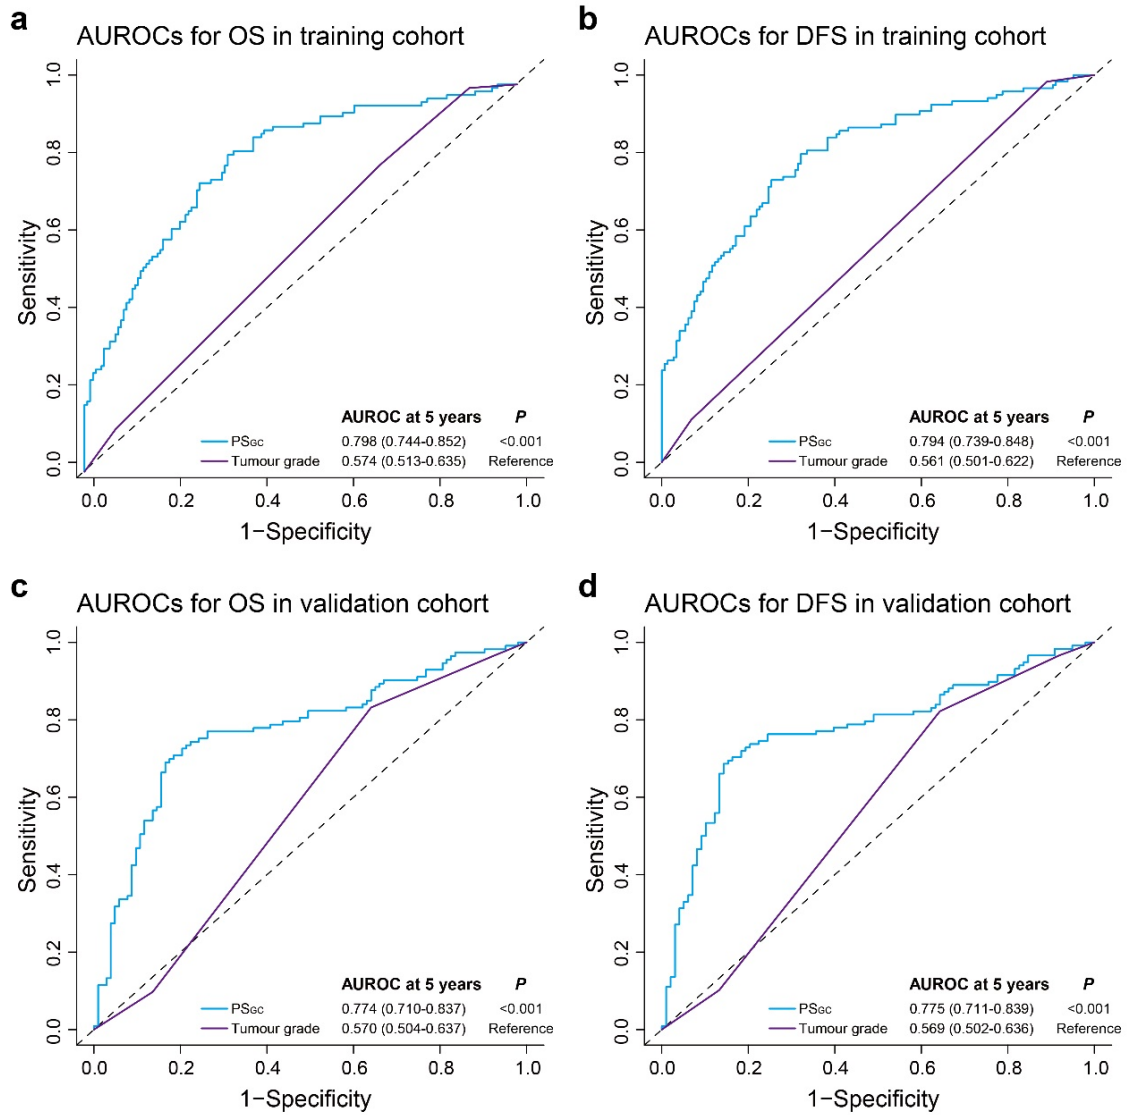

**Supplementary Fig. 20.** Comparison of AUROCs between the PSec and tumour grade.

**(a)** Comparison of AUROCs for OS between the PSec and tumour grade in the training cohort. **(b)** Comparison of AUROCs for DFS between the PSec and tumour grade in the training cohort. **(c)** Comparison of AUROCs for OS between the PSec and tumour grade in the validation cohort. **(d)** Comparison of AUROCs for DFS between the PSec and tumour grade in the validation cohort. In training cohort, n=264 patients. In validation cohort, n=216 patients. The comparisons of AUROCs between two models are performed using a two-sided Delong test. AUROC, area under the receiver operating characteristic curve; OS, overall survival; DFS, disease-free survival; PSec, pathomics signature of gastric cancer. Source data are provided as a Source data file.

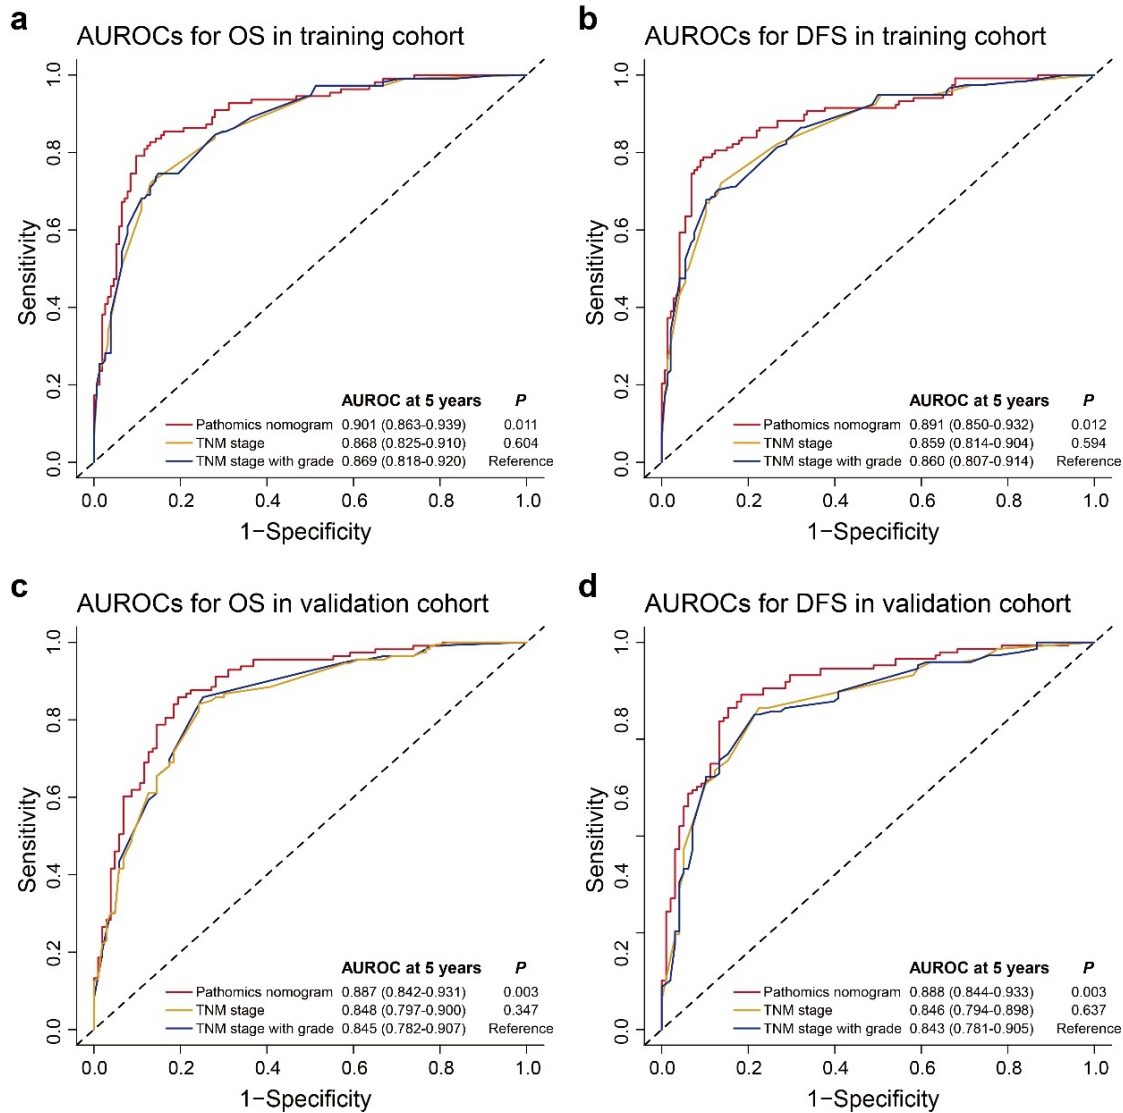

**Supplementary Fig. 21.** Comparison of AUROCs between the PS<sub>GC</sub> and tumour grade when added to the TNM staging system. **(a)** Comparison of AUROCs for OS between the PS<sub>GC</sub> and tumour grade when added to the TNM staging system in the training cohort. **(b)** Comparison of AUROCs for DFS between the PS<sub>GC</sub> and tumour grade when added to the TNM staging system in the training cohort. **(c)** Comparison of AUROCs for OS between the PS<sub>GC</sub> and tumour grade when added to the TNM staging system in the validation cohort. **(d)** Comparison of AUROCs for DFS between the PS<sub>GC</sub> and tumour grade when added to the TNM staging system in the validation cohort. In training cohort, n=264 patients. In validation cohort, n=216 patients. The comparisons of AUROCs between two models are performed using a two-sided Delong test. AUROC, area under the receiver operating characteristic curve; OS, overall survival; DFS, disease-free survival; PS<sub>GC</sub>, pathomics signature of gastric cancer; TNM, tumour-node-metastasis. Source data are provided as a Source data file.

## Supplementary Note

$$\begin{aligned} \text{PS}_{\text{GC}} = & -2.063035280 \times \text{Correlation\_RWC\_Haematoxylin\_Eosin} \\ & +0.078385636 \times \text{Granularity\_H\&E\_11} \\ & -0.073252770 \times \text{Granularity\_Haematoxylin\_12} \\ & -0.003034897 \times \text{Granularity\_H\&E\_14} \\ & +0.066500543 \times \text{Granularity\_Haematoxylin\_14} \\ & -0.009349483 \times \text{Granularity\_Eosin\_15} \\ & -0.218289983 \times \text{Granularity\_H\&E\_5} \\ & -0.038121536 \times \text{Granularity\_Eosin\_6} \\ & +0.084302603 \times \text{Granularity\_Haematoxylin\_7} \\ & -0.002226299 \times \text{Granularity\_Eosin\_8} \\ & +0.194997260 \times \text{LocalFocusScore\_H\&E} \\ & +0.848055697 \times \text{PowerLogLogSlope\_H\&E} \\ & +3.2 \end{aligned}$$

## Supplementary Tables

**Supplementary Table 1.** Comparison of clinicopathological characteristics between patients with and without complete data

| Variables                        | Complete data group (n=480) |      | Incomplete data group (n=24) |       | <i>P</i> |
|----------------------------------|-----------------------------|------|------------------------------|-------|----------|
|                                  | n                           | %    | n                            | %     |          |
| <b>Age</b>                       |                             |      |                              |       | 0.453    |
| ≤ 60 years                       | 283                         | 58.9 | 16                           | 66.7  |          |
| > 60 years                       | 197                         | 41.4 | 8                            | 33.3  |          |
| <b>Age (years), median (IQR)</b> | 58 (49-65)                  |      | 55.5 (44-61.75)              |       | 0.120    |
| <b>Sex</b>                       |                             |      |                              |       | 0.880    |
| Male                             | 333                         | 69.4 | 17                           | 70.8  |          |
| Female                           | 147                         | 30.6 | 7                            | 29.2  |          |
| <b>ECOG PS</b>                   |                             |      |                              |       | 0.531    |
| 0                                | 348                         | 72.5 | 17                           | 70.8  |          |
| 1                                | 123                         | 25.6 | 6                            | 25.0  |          |
| 2                                | 9                           | 1.9  | 1                            | 4.2   |          |
| <b>Tumour location</b>           |                             |      |                              |       | 0.999    |
| Fundus of stomach                | 104                         | 21.7 | 5                            | 20.8  |          |
| Body of stomach                  | 92                          | 19.2 | 4                            | 16.7  |          |
| Antrum of stomach                | 284                         | 59.1 | 15                           | 62.5  |          |
| <b>Tumour grade</b>              |                             |      |                              |       | 0.670    |
| Grade 1                          | 30                          | 6.3  | 2                            | 8.3   |          |
| Grade 2                          | 98                          | 20.4 | 6                            | 25.0  |          |
| Grade 3                          | 304                         | 63.3 | 13                           | 54.2  |          |
| Grade 4                          | 48                          | 10.0 | 3                            | 12.5  |          |
| <b>Depth of invasion</b>         |                             |      |                              |       | 0.781    |
| T1                               | 78                          | 16.3 | 4                            | 16.7  |          |
| T2                               | 41                          | 8.5  | 2                            | 8.3   |          |
| T3                               | 48                          | 10.0 | 4                            | 16.7  |          |
| T4a                              | 267                         | 55.6 | 13                           | 54.2  |          |
| T4b                              | 46                          | 9.6  | 1                            | 4.1   |          |
| <b>Lymph node metastasis</b>     |                             |      |                              |       | 0.356    |
| N0                               | 193                         | 40.2 | 14                           | 58.3  |          |
| N1                               | 90                          | 18.6 | 4                            | 16.7  |          |
| N2                               | 80                          | 16.7 | 4                            | 16.7  |          |
| N3a                              | 71                          | 14.9 | 2                            | 8.3   |          |
| N3b                              | 46                          | 9.6  | 0                            | 0     |          |
| <b>Distant metastasis</b>        |                             |      |                              |       | 0.615    |
| M0                               | 460                         | 95.8 | 24                           | 100.0 |          |
| M1                               | 20                          | 4.2  | 0                            | 0     |          |

The comparison of continuous age variable between two groups are performed using a two-sided Mann-Whitney *U* test, and the rest variables are compared using a two-sided  $\chi^2$  or Fisher's exact test.

IQR, interquartile range; ECOG PS, Eastern Cooperative Oncology Group performance status.

**Supplementary Table 2.** Assessment of interaction effects between the PS<sub>GC</sub> and depth of invasion

| Variables                                | Overall survival       |          | Disease-free survival  |          |
|------------------------------------------|------------------------|----------|------------------------|----------|
|                                          | HR (95% CI)            | <i>P</i> | HR (95% CI)            | <i>P</i> |
| <b>PS<sub>GC</sub></b>                   | 3.407 (0.237-48.877)   | 0.367    | 4.928 (0.619-39.231)   | 0.132    |
| <b>Depth of invasion</b>                 |                        | 0.087    |                        | 0.142    |
| T1                                       | Reference              | -        | Reference              | -        |
| T2                                       | 1.069 (0.018-61.327)   | 0.974    | 1.293 (0.038-43.960)   | 0.886    |
| T3                                       | 2.152 (0.055-83.928)   | 0.682    | 2.491 (0.104-59.633)   | 0.573    |
| T4a                                      | 8.041 (0.301-214.923)  | 0.214    | 7.912 (0.528-118.526)  | 0.134    |
| T4b                                      | 21.979 (0.672-718.523) | 0.082    | 17.223 (0.869-340.961) | 0.062    |
| <b>Lymph node metastasis</b>             |                        | <0.001   |                        | <0.001   |
| N0                                       | Reference              | -        | Reference              | -        |
| N1                                       | 1.462 (0.769-2.781)    | 0.247    | 1.263 (0.685-2.332)    | 0.453    |
| N2                                       | 2.588 (1.391-4.814)    | 0.003    | 2.276 (1.261-4.107)    | 0.006    |
| N3a                                      | 3.964 (2.163-7.264)    | <0.001   | 3.896 (2.191-6.927)    | <0.001   |
| N3b                                      | 5.994 (3.023-11.884)   | <0.001   | 4.703 (2.422-9.132)    | <0.001   |
| <b>Distant metastasis (M1 vs. M0)</b>    | 2.641 (1.362-5.119)    | 0.004    | 2.510 (1.301-4.839)    | 0.005    |
| <b>PS<sub>GC</sub>×Depth of invasion</b> |                        | 0.481    |                        | 0.583    |
| PS <sub>GC</sub> ×T1                     | Reference              | -        | Reference              | -        |
| PS <sub>GC</sub> ×T2                     | 1.719 (0.074-39.917)   | 0.735    | 0.999 (0.073-13.634)   | 0.999    |
| PS <sub>GC</sub> ×T3                     | 1.173 (0.066-20.775)   | 0.913    | 0.824 (0.077-8.762)    | 0.872    |
| PS <sub>GC</sub> ×T4a                    | 0.624 (0.041-9.282)    | 0.732    | 0.458 (0.055-3.815)    | 0.470    |
| PS <sub>GC</sub> ×T4b                    | 0.449 (0.028-7.181)    | 0.571    | 0.342 (0.037-3.177)    | 0.346    |

Association of all variables with prognosis is analyzed using a two-sided Cox proportional hazard regression analysis.

PS<sub>GC</sub>, pathomics signature of gastric cancer; HR, hazard ratio; CI, confidence interval.

**Supplementary Table 3.** Assessment of interaction effects between the PS<sub>GC</sub> and lymph node metastasis

| Variables                                    | Overall survival       |          | Disease-free survival  |          |
|----------------------------------------------|------------------------|----------|------------------------|----------|
|                                              | HR (95% CI)            | <i>P</i> | HR (95% CI)            | <i>P</i> |
| <b>PS<sub>GC</sub></b>                       | 2.569 (1.024-6.444)    | 0.044    | 3.601 (1.510-8.592)    | 0.004    |
| <b>Depth of invasion</b>                     |                        | 0.007    |                        | 0.039    |
| T1                                           | Reference              | -        | Reference              | -        |
| T2                                           | 2.162 (0.498-9.377)    | 0.303    | 1.324 (0.372-4.711)    | 0.665    |
| T3                                           | 2.586 (0.677-9.744)    | 0.166    | 1.947 (0.657-5.771)    | 0.230    |
| T4a                                          | 4.591 (1.365-15.440)   | 0.014    | 3.007 (1.149-7.867)    | 0.025    |
| T4b                                          | 7.645 (2.042-28.614)   | 0.003    | 4.075 (1.364-12.173)   | 0.012    |
| <b>Lymph node metastasis</b>                 |                        | <0.001   |                        | <0.001   |
| N0                                           | Reference              | -        | Reference              | -        |
| N1                                           | 0.192 (0.020-1.806)    | 0.147    | 0.419 (0.051-3.453)    | 0.419    |
| N2                                           | 3.723 (0.672-20.666)   | 0.132    | 4.252 (0.806-22.432)   | 0.088    |
| N3a                                          | 5.943 (1.003-35.222)   | 0.050    | 7.041 (1.183-41.919)   | 0.032    |
| N3b                                          | 25.708 (4.035-163.789) | <0.001   | 52.349 (8.032-341.183) | <0.001   |
| <b>Distant metastasis (M1 vs. M0)</b>        | 2.733 (1.378-5.421)    | 0.004    | 2.516 (1.282-4.936)    | 0.007    |
| <b>PS<sub>GC</sub>×Lymph node metastasis</b> |                        | 0.202    |                        | 0.108    |
| PS <sub>GC</sub> ×N0                         | Reference              | -        | Reference              | -        |
| PS <sub>GC</sub> ×N1                         | 3.927 (0.954-16.168)   | 0.058    | 2.077 (0.543-7.953)    | 0.286    |
| PS <sub>GC</sub> ×N2                         | 0.755 (0.242-2.357)    | 0.629    | 0.621 (0.209-1.846)    | 0.391    |
| PS <sub>GC</sub> ×N3a                        | 0.738 (0.229-2.379)    | 0.610    | 0.642 (0.201-2.042)    | 0.452    |
| PS <sub>GC</sub> ×N3b                        | 0.434 (0.133-1.415)    | 0.166    | 0.241 (0.074-0.778)    | 0.017    |

Association of all variables with prognosis is analyzed using a two-sided Cox proportional hazard regression analysis.

PS<sub>GC</sub>, pathomics signature of gastric cancer; HR, hazard ratio; CI, confidence interval.

**Supplementary Table 4.** Assessment of interaction effects between the PS<sub>GC</sub> and distant metastasis

| Variables                                 | Overall survival     |          | Disease-free survival |          |
|-------------------------------------------|----------------------|----------|-----------------------|----------|
|                                           | HR (95% CI)          | <i>P</i> | HR (95% CI)           | <i>P</i> |
| <b>PS<sub>GC</sub></b>                    | 2.263 (1.561-3.282)  | <0.001   | 2.386 (1.642-3.469)   | <0.001   |
| <b>Depth of invasion</b>                  |                      | 0.018    |                       | 0.047    |
| T1                                        | Reference            | -        | Reference             | -        |
| T2                                        | 2.289 (0.536-9.772)  | 0.875    | 1.440 (0.409-5.064)   | 0.569    |
| T3                                        | 3.253 (0.878-12.046) | 0.569    | 2.409 (0.826-7.030)   | 0.107    |
| T4a                                       | 4.742 (1.431-15.715) | 0.134    | 3.201 (1.233-8.304)   | 0.016    |
| T4b                                       | 7.360 (1.987-27.257) | 0.062    | 4.235 (1.428-12.564)  | 0.009    |
| <b>Lymph node metastasis</b>              |                      | <0.001   |                       | <0.001   |
| N0                                        | Reference            | -        | Reference             | -        |
| N1                                        | 1.486 (0.769-2.872)  | 0.454    | 1.340 (0.719-2.496)   | 0.356    |
| N2                                        | 2.502 (1.341-4.671)  | 0.007    | 2.268 (1.253-4.105)   | 0.006    |
| N3a                                       | 3.776 (2.028-7.030)  | <0.001   | 3.905 (2.163-7.051)   | <0.001   |
| N3b                                       | 5.939 (3.005-11.738) | <0.001   | 4.820 (2.485-9.350)   | <0.001   |
| <b>Distant metastasis (M1 vs. M0)</b>     | 5.313 (0.292-96.656) | 0.259    | 2.798 (0.138-56.596)  | 0.502    |
| <b>PS<sub>GC</sub>×Distant metastasis</b> | 0.641 (0.103-3.988)  | 0.633    | 0.942 (0.141-6.315)   | 0.951    |

Association of all variables with prognosis is analyzed using a two-sided Cox proportional hazard regression analysis.

PS<sub>GC</sub>, pathomics signature of gastric cancer; HR, hazard ratio; CI, confidence interval.



**Supplementary Table 5.** Multivariate Cox regression analyses of overall survival and disease-free survival without the PS<sub>GC</sub>

| Variables                             | Overall survival      |          | Disease-free survival |          |
|---------------------------------------|-----------------------|----------|-----------------------|----------|
|                                       | HR (95% CI)           | <i>P</i> | HR (95% CI)           | <i>P</i> |
| <b>Depth of invasion</b>              |                       | <0.001   |                       | 0.002    |
| T1                                    | Reference             | -        | Reference             | -        |
| T2                                    | 2.328 (0.544-9.972)   | 0.255    | 1.492 (0.423-5.269)   | 0.534    |
| T3                                    | 3.475 (0.936-12.902)  | 0.063    | 2.723 (0.933-7.943)   | 0.067    |
| T4a                                   | 6.017 (1.825-19.837)  | 0.003    | 4.148 (1.610-10.688)  | 0.003    |
| T4b                                   | 10.682 (2.943-38.767) | <0.001   | 6.070 (2.086-17.664)  | 0.001    |
| <b>Lymph node metastasis</b>          |                       | <0.001   |                       | <0.001   |
| N0                                    | Reference             | -        | Reference             | -        |
| N1                                    | 1.582 (0.832-3.008)   | 0.162    | 1.432 (0.777-2.640)   | 0.250    |
| N2                                    | 2.916 (1.580-5.381)   | 0.001    | 2.679 (1.497-4.794)   | 0.001    |
| N3a                                   | 4.531 (2.486-8.260)   | <0.001   | 4.684 (2.642-8.307)   | <0.001   |
| N3b                                   | 8.762 (4.615-16.636)  | <0.001   | 7.600 (4.101-14.084)  | <0.001   |
| <b>Distant metastasis (M1 vs. M0)</b> | 2.862 (1.475-5.551)   | 0.002    | 2.638 (1.363-5.106)   | 0.004    |

Association of all variables with prognosis is analyzed using a two-sided Cox proportional hazard regression analysis.

PS<sub>GC</sub>, pathomics signature of gastric cancer; HR, hazard ratio; CI, confidence interval.

**Supplementary Table 6.** C-indexes for overall survival and disease-free survival in different models

| Model                        | Training cohort     |           | Validation cohort   |           |
|------------------------------|---------------------|-----------|---------------------|-----------|
|                              | C-index (95% CI)    | <i>P</i>  | C-index (95% CI)    | <i>P</i>  |
| <b>Overall survival</b>      |                     |           |                     |           |
| Pathomics nomogram           | 0.809 (0.741-0.878) | 0.002     | 0.784 (0.706-0.862) | <0.001    |
| TNM stage                    | 0.782 (0.709-0.855) | Reference | 0.742 (0.656-0.828) | Reference |
| PS <sub>GC</sub>             | 0.727 (0.641-0.813) | -         | 0.725 (0.627-0.823) | -         |
| <b>Disease-free survival</b> |                     |           |                     |           |
| Pathomics nomogram           | 0.792 (0.718-0.866) | 0.022     | 0.794 (0.709-0.873) | <0.001    |
| TNM stage                    | 0.770 (0.694-0.846) | Reference | 0.748 (0.660-0.836) | Reference |
| PS <sub>GC</sub>             | 0.712 (0.622-0.802) | -         | 0.738 (0.642-0.834) | -         |

The comparisons of C-indexes between two models are performed using a two-sided *z*-score test.

TNM, tumour -node-metastasis; PS<sub>GC</sub>, pathomics signature of gastric cancer; CI, confidence interval.

**Supplementary Table 7.** Net reclassification improvement of adding the PS<sub>GC</sub> to the TNM stage model

| Model                                   | Overall survival    |          | Disease-free survival |          |
|-----------------------------------------|---------------------|----------|-----------------------|----------|
|                                         | NRI (95% CI)        | <i>P</i> | NRI (95% CI)          | <i>P</i> |
| <b>Pathomics nomogram vs. TNM stage</b> |                     |          |                       |          |
| Training cohort                         | 0.177 (0.021-0.319) | 0.026    | 0.218 (0.048-0.344)   | 0.012    |
| Validation cohort                       | 0.318 (0.147-0.497) | 0.010    | 0.380 (0.141-0.556)   | 0.028    |

The comparisons of NRI between two models are performed using a two-sided Z test.

PS<sub>GC</sub>, pathomics signature of gastric cancer; TNM, tumour-node-metastasis; NRI, net reclassification improvement; CI, confidence interval.

**Supplementary Table 8.** Clinicopathological characteristics of patients with stage II and III disease according to receipt of chemotherapy

| Variables                    | Number | No chemotherapy (n=109) |      | Chemotherapy (n=267) |      |
|------------------------------|--------|-------------------------|------|----------------------|------|
|                              |        | n                       | %    | n                    | %    |
| <b>Age</b>                   |        |                         |      |                      |      |
| ≤60 years                    | 221    | 50                      | 45.9 | 171                  | 64.0 |
| >60 years                    | 155    | 59                      | 54.1 | 96                   | 36.0 |
| <b>Sex</b>                   |        |                         |      |                      |      |
| Male                         | 262    | 73                      | 67.0 | 189                  | 70.8 |
| Female                       | 114    | 36                      | 33.0 | 78                   | 29.2 |
| <b>ECOG PS</b>               |        |                         |      |                      |      |
| 0                            | 282    | 82                      | 75.2 | 200                  | 74.9 |
| 1                            | 88     | 26                      | 23.9 | 62                   | 23.2 |
| 2                            | 6      | 1                       | 0.9  | 5                    | 1.9  |
| <b>CEA level</b>             |        |                         |      |                      |      |
| Normal                       | 306    | 87                      | 79.8 | 219                  | 82.0 |
| Elevated                     | 70     | 22                      | 20.2 | 48                   | 18.0 |
| <b>CA 19-9 level</b>         |        |                         |      |                      |      |
| Normal                       | 305    | 85                      | 78.0 | 220                  | 82.4 |
| Elevated                     | 71     | 24                      | 22.0 | 47                   | 17.6 |
| <b>Tumour location</b>       |        |                         |      |                      |      |
| Fundus of the stomach        | 87     | 27                      | 24.8 | 60                   | 22.5 |
| Body of the stomach          | 79     | 25                      | 22.9 | 54                   | 20.2 |
| Antrum of the stomach        | 210    | 57                      | 53.3 | 153                  | 57.3 |
| <b>Tumour size</b>           |        |                         |      |                      |      |
| ≤4 cm                        | 176    | 42                      | 38.5 | 134                  | 50.2 |
| >4 cm                        | 200    | 67                      | 61.5 | 133                  | 49.8 |
| <b>Tumour grade</b>          |        |                         |      |                      |      |
| Grade 1                      | 10     | 3                       | 2.8  | 7                    | 2.6  |
| Grade 2                      | 73     | 27                      | 24.8 | 46                   | 17.2 |
| Grade 3                      | 256    | 69                      | 63.3 | 187                  | 70.1 |
| Grade 4                      | 37     | 10                      | 9.1  | 27                   | 10.1 |
| <b>Lauren type</b>           |        |                         |      |                      |      |
| Intestinal type              | 155    | 48                      | 44.0 | 107                  | 40.1 |
| Diffuse and mixed type       | 221    | 61                      | 56.0 | 160                  | 59.9 |
| <b>Depth of invasion</b>     |        |                         |      |                      |      |
| T1                           | 8      | 2                       | 1.8  | 6                    | 2.2  |
| T2                           | 27     | 10                      | 9.2  | 17                   | 6.4  |
| T3                           | 47     | 13                      | 11.9 | 34                   | 12.7 |
| T4a                          | 252    | 72                      | 66.1 | 180                  | 67.4 |
| T4b                          | 42     | 12                      | 11.0 | 30                   | 11.3 |
| <b>Lymph node metastasis</b> |        |                         |      |                      |      |
| N0                           | 111    | 31                      | 28.4 | 80                   | 30.0 |
| N1                           | 81     | 27                      | 24.8 | 54                   | 20.2 |

|                  |     |    |      |     |      |
|------------------|-----|----|------|-----|------|
| N2               | 78  | 31 | 28.4 | 47  | 17.6 |
| N3a              | 64  | 15 | 13.8 | 49  | 18.4 |
| N3b              | 42  | 5  | 4.6  | 37  | 13.8 |
| <b>TNM stage</b> |     |    |      |     |      |
| Stage II         | 140 | 40 | 36.7 | 100 | 37.5 |
| Stage III        | 236 | 69 | 63.3 | 167 | 62.5 |

---

CEA, carcinoembryonic antigen; CA, carbohydrate antigen; TNM, tumour-node-metastasis; ECOG PS, Eastern Cooperative Oncology Group performance status.

**Supplementary Table 9.** Comparison of ECOG PS with receipt of adjuvant chemotherapy in patients with a high PS<sub>GC</sub> and stage II or III diseases

| ECOG PS | Training cohort |      |                 |      |          | Validation cohort |      |                 |      |          |
|---------|-----------------|------|-----------------|------|----------|-------------------|------|-----------------|------|----------|
|         | Chemotherapy    |      | No chemotherapy |      | <i>P</i> | Chemotherapy      |      | No chemotherapy |      | <i>P</i> |
|         | n               | %    | n               | %    |          | n                 | %    | n               | %    |          |
| 0       | 63              | 70.0 | 21              | 72.4 | 0.999    | 43                | 71.7 | 22              | 73.3 | 0.999    |
| 1       | 25              | 27.8 | 8               | 27.6 |          | 16                | 26.7 | 7               | 23.3 |          |
| 2       | 2               | 2.2  | 0               | 0    |          | 1                 | 1.6  | 1               | 3.4  |          |

The comparisons of variables between two groups are performed using a two-sided Fisher's exact test.

ECOG PS, Eastern Cooperative Oncology Group performance status.

**Supplementary Table 10.** Association of the PS<sub>GC</sub> with overall survival and disease-free survival in stage II and III patients receiving adjuvant chemotherapy

| PS <sub>GC</sub> level                     | Adjuvant chemotherapy |       | Overall survival    |          |                                 | Disease-free survival |          |                                 |
|--------------------------------------------|-----------------------|-------|---------------------|----------|---------------------------------|-----------------------|----------|---------------------------------|
|                                            | No chemo              | Chemo | HR (95% CI)         | <i>P</i> | <i>P</i> <sub>interaction</sub> | HR (95% CI)           | <i>P</i> | <i>P</i> <sub>interaction</sub> |
| Stage II (n=140)                           |                       |       |                     |          |                                 |                       |          |                                 |
| High PS <sub>GC</sub> (Chemo vs. No chemo) | 15                    | 38    | 1.049 (0.436-2.521) | 0.915    | <0.001                          | 1.174 (0.494-2.786)   | 0.717    | <0.001                          |
| Low PS <sub>GC</sub> (Chemo vs. No chemo)  | 25                    | 62    | 0.224 (0.054-0.983) | 0.041    |                                 | 0.226 (0.054-0.946)   | 0.042    |                                 |
| Stage III (n=236)                          |                       |       |                     |          |                                 |                       |          |                                 |
| High PS <sub>GC</sub> (Chemo vs. No chemo) | 44                    | 112   | 0.745 (0.512-1.083) | 0.123    | 0.005                           | 0.875 (0.606-1.264)   | 0.477    | <0.001                          |
| Low PS <sub>GC</sub> (Chemo vs. No chemo)  | 25                    | 55    | 0.392 (0.211-0.729) | 0.003    |                                 | 0.453 (0.247-0.834)   | 0.011    |                                 |

Association of all variables with prognosis is analyzed using a two-sided Cox proportional hazard regression analysis.

PS<sub>GC</sub>, pathomics signature of gastric cancer; HR, hazard ratio; CI, confidence interval; Chemo, chemotherapy.

**Supplementary Table 11.** Comparison of C-indexes between the PS<sub>GC</sub> and tumour grade

| Variable                     | Training cohort     |           | Validation cohort   |           |
|------------------------------|---------------------|-----------|---------------------|-----------|
|                              | C-index (95% CI)    | <i>P</i>  | C-index (95% CI)    | <i>P</i>  |
| <b>Overall survival</b>      |                     |           |                     |           |
| PS <sub>GC</sub>             | 0.727 (0.641-0.813) | <0.001    | 0.725 (0.627-0.823) | <0.001    |
| Tumour grade                 | 0.569 (0.483-0.655) | Reference | 0.562 (0.472-0.652) | Reference |
| <b>Disease-free survival</b> |                     |           |                     |           |
| PS <sub>GC</sub>             | 0.712 (0.622-0.802) | <0.001    | 0.738 (0.642-0.834) | <0.001    |
| Tumour grade                 | 0.553 (0.465-0.641) | Reference | 0.552 (0.462-0.642) | Reference |

The comparisons of C-indexes between two models are performed using a two-sided z-score test.

PS<sub>GC</sub>, pathomics signature of gastric cancer; CI, confidence interval.



**Supplementary Table 12.** Comparison of C-indexes between the tumour grade and PS<sub>GC</sub> when added to the TNM staging system

| Model                                    | Training cohort     |           | Validation cohort   |           |
|------------------------------------------|---------------------|-----------|---------------------|-----------|
|                                          | C-index (95% CI)    | <i>P</i>  | C-index (95% CI)    | <i>P</i>  |
| <b>Overall survival</b>                  |                     |           |                     |           |
| Pathomics nomogram                       | 0.809 (0.741-0.878) | 0.008     | 0.784 (0.706-0.862) | <0.001    |
| TNM stage                                | 0.782 (0.709-0.855) | 0.582     | 0.742 (0.656-0.828) | 0.979     |
| TNM stage combined with the tumour grade | 0.784 (0.711-0.857) | Reference | 0.743 (0.657-0.829) | Reference |
| <b>Disease-free survival</b>             |                     |           |                     |           |
| Pathomics nomogram                       | 0.792 (0.718-0.866) | 0.039     | 0.794 (0.709-0.873) | <0.001    |
| TNM stage                                | 0.770 (0.694-0.846) | 0.675     | 0.748 (0.660-0.836) | 0.318     |
| TNM stage combined with the tumour grade | 0.771 (0.695-0.847) | Reference | 0.744 (0.654-0.834) | Reference |

The comparisons of C-indexes between two models are performed using a two-sided *z*-score test.

TNM, tumour-node-metastasis; PS<sub>GC</sub>, pathomics signature of gastric cancer; CI, confidence interval.

**Supplementary Table 13.** Comparison of C-indexes between the PS<sub>GC</sub> and lymph node metastasis

| Variable                     | Training cohort     |           | Validation cohort   |           |
|------------------------------|---------------------|-----------|---------------------|-----------|
|                              | C-index (95% CI)    | <i>P</i>  | C-index (95% CI)    | <i>P</i>  |
| <b>Overall survival</b>      |                     |           |                     |           |
| PS <sub>GC</sub>             | 0.727 (0.641-0.813) | 0.708     | 0.725 (0.627-0.823) | 0.822     |
| Lymph node metastasis        | 0.737 (0.647-0.821) | Reference | 0.717 (0.629-0.805) | Reference |
| <b>Disease-free survival</b> |                     |           |                     |           |
| PS <sub>GC</sub>             | 0.712 (0.622-0.802) | 0.584     | 0.738 (0.642-0.834) | 0.611     |
| Lymph node metastasis        | 0.736 (0.646-0.820) | Reference | 0.721 (0.631-0.811) | Reference |

The comparisons of C-indexes between two variables are performed using a two-sided *z*-score test.

PS<sub>GC</sub>, pathomics signature of gastric cancer; CI, confidence interval.

**Supplementary Table 14.** Comparison of AUROCs between the PS<sub>GC</sub> and lymph node metastasis

| Variable                     | Training cohort     |           | Validation cohort   |           |
|------------------------------|---------------------|-----------|---------------------|-----------|
|                              | AUROC (95% CI)      | <i>P</i>  | AUROC (95% CI)      | <i>P</i>  |
| <b>Overall survival</b>      |                     |           |                     |           |
| PS <sub>GC</sub>             | 0.798 (0.744-0.852) | 0.575     | 0.774 (0.710-0.837) | 0.354     |
| Lymph node metastasis        | 0.796 (0.742-0.850) | Reference | 0.809 (0.753-0.866) | Reference |
| <b>Disease-free survival</b> |                     |           |                     |           |
| PS <sub>GC</sub>             | 0.794 (0.739-0.848) | 0.638     | 0.775 (0.711-0.839) | 0.378     |
| Lymph node metastasis        | 0.794 (0.741-0.847) | Reference | 0.816 (0.760-0.872) | Reference |

The comparisons of AUROCs between two variables are performed using a two-sided Delong test.

PS<sub>GC</sub>, pathomics signature of gastric cancer; AUROC, area under the receiver operating characteristic curve; CI, confidence interval.

**Supplementary Table 15.** Summary of the pathomics features

| Features classification              | Features description             |
|--------------------------------------|----------------------------------|
| <b>Image quality features</b>        | FocusScore_ $\alpha$             |
|                                      | LocalFocusScore_ $\alpha$        |
|                                      | Correlation_ $\alpha$            |
|                                      | PowerLogLogSlope_ $\alpha$       |
|                                      | MeanIntensity_ $\alpha$          |
|                                      | MedianIntensity_ $\alpha$        |
|                                      | StdIntensity_ $\alpha$           |
|                                      | MADIntensity_ $\alpha$           |
|                                      | LowerQuartileIntensity_ $\alpha$ |
|                                      | UpperQuartileIntensity_ $\alpha$ |
| <b>Image colocalization features</b> | Threshold_ $\alpha$              |
|                                      | Correlation_Eosin_Haematoxylin   |
|                                      | Costes_Eosin_Haematoxylin        |
|                                      | Costes_Haematoxylin_Eosin        |
|                                      | Manders_Eosin_Haematoxylin       |
|                                      | Manders_Haematoxylin_Eosin       |
|                                      | Overlap_Eosin_Haematoxylin       |
|                                      | RWC_Eosin_Haematoxylin           |
|                                      | RWC_Haematoxylin_Eosin           |
| <b>Image granularity features</b>    | Slope_Eosin_Haematoxylin         |
|                                      | Granularity_ $\alpha$ _ $\beta$  |

$\alpha$  represents the type of images, which could be haematoxylin, eosin, and H&E;

$\beta$  represents the granular spectrum, which could be 1, 2, 3, 4, ..., 15, 16.

H&E, haematoxylin and eosin.

## Supplementary References

1. Carpenter, A.E. et al. CellProfiler: image analysis software for identifying and quantifying cell phenotypes. *Genome Biol.* **7**, R100 (2006).
2. Kamentsky, L. et al. Improved structure, function and compatibility for CellProfiler: modular high-throughput image analysis software. *Bioinformatics* **27**, 1179-80 (2011).
3. Ruifrok, A.C. & Johnston, D.A. Quantification of histochemical staining by color deconvolution. *Anal. Quant. Cytol. Histol.* **23**, 291-9 (2001).
4. Bray, M.A., Fraser, A.N., Hasaka, T.P. & Carpenter, A.E. Workflow and metrics for image quality control in large-scale high-content screens. *J. Biomol. Screen.* **17**, 266-74 (2012).
5. Field, D.J. Relations between the statistics of natural images and the response properties of cortical cells. *J. Opt. Soc. Am. A* **4**, 2379-94 (1987).
6. Haralick, R.M. Statistical and structural approaches to texture. *Proc. IEEE* **67**, 786-804 (1979).
7. Sun, Y., Duthaler, S. & Nelson, B.J. Autofocusing in computer microscopy: selecting the optimal focus algorithm. *Microsc. Res. Tech.* **65**, 139-49 (2004).
8. Otsu, N. A thresholding selection method from gray-level histogram. *IEEE Trans. Syst. Man. Cybern.* **9**, 62-66 (1979).
9. Aaron, J.S., Taylor, A.B. & Chew, T.L. Image co-localization - co-occurrence versus correlation. *J. Cell. Sci.* **131**(2018).
10. Costes, S.V. et al. Automatic and quantitative measurement of protein-protein colocalization in live cells. *Biophys J.* **86**, 3993-4003 (2004).

11. Singan, V.R., Jones, T.R., Curran, K.M. & Simpson, J.C. Dual channel rank-based intensity weighting for quantitative co-localization of microscopy images. *BMC Bioinformatics* **12**, 407 (2011).
12. Vincent, L. Granulometries and opening trees. *Fund. Inform.* **41**, 57-90 (2000).
13. Maragos, P. Pattern spectrum and multiscale shape representation. *IEEE Trans. Pattern. Anal. Mach. Intell.* **11**, 701 - 716 (1989).
